# Supplementary material
Source: MDPI journal article supplement (https://www.mdpi.com/2073-4344/12/5/546)
Supplement: s1 [file s1]

# ***Supporting Information***

for

## **Expanding Access to Optically Active Non-steroidal Anti-inflammatory Drugs *via* Lipase-catalyzed KR of Racemic Acids Using Trialkyl Orthoesters as Irreversible Alkoxy Group Donors**

Beata Zdun,<sup>a</sup> Piotr Cieřła,<sup>a</sup> Jan Kutner,<sup>b</sup> and Paweł Borowiecki<sup>\*,a</sup>

<sup>a</sup> Warsaw University of Technology, Department of Drugs Technology and Biotechnology, Laboratory of Biocatalysis and Biotransformations, Koszykowa St. 75, 00-662 Warsaw, Poland.

<sup>b</sup> Laboratory for Structural and Biochemical Research, Biological and Chemical Research Centre, Department of Chemistry, University of Warsaw, Żwirki i Wigury 101, 02-089 Warsaw, Poland.

Email: Dr. Paweł Borowiecki\* – pawel.borowiecki@pw.edu.pl (\* Corresponding author)

### **Table of contents**

|                                                                                                                                                                 |         |
|-----------------------------------------------------------------------------------------------------------------------------------------------------------------|---------|
| <b>Table S1.</b> List of commercial enzyme preparations employed in these studies .....                                                                         | S2      |
| <b>Table S2.</b> The results of specific rotation values for the EKR products .....                                                                             | S3      |
| <b>Table S3.</b> HPLC analytical separation conditions of NSAIDs and their esters by chiral columns – (S,S)-Whelk-O 1 or Chiralcel OJ-H or Chiralpak AD-H ..... | S4      |
| Copies of HPLC chromatograms .....                                                                                                                              | S5–S14  |
| Copies of NMR, MS, FTMS, IR spectra .....                                                                                                                       | S15–S46 |
| References .....                                                                                                                                                | S47     |

**Table S1. List of commercial enzyme preparations employed in these studies.**

| Enzyme and its origin (microorganism/tissue)                                  | Enzyme preparation <sup>[a]</sup> (brand name) | Usage form of enzyme preparation                                                                         | Enzyme specified activity                   | Commercial supplier (Cat. No.)            |
|-------------------------------------------------------------------------------|------------------------------------------------|----------------------------------------------------------------------------------------------------------|---------------------------------------------|-------------------------------------------|
| Lipase from <i>Candida antarctica</i> B (CAL-B)                               | Novozym 435                                    | immobilized on the macroporous acrylic resin [poly (methyl methacrylate-co-butyl methacrylate)]          | >10000 U/g or 10 PLU/mg, water content 1.4% | Novozymes A/S (Bagsvaerd, Denmark)        |
|                                                                               | Lipozyme 435                                   | immobilized on Lewatit VP OC 1600                                                                        | unspecified                                 | Novozymes A/S (Bagsvaerd, Denmark)        |
|                                                                               | Chirazyme L-2, c.-f., C2, Lyo.                 | immobilized on the carrier-fixed (carrier 2)                                                             | 150 kU                                      | Roche                                     |
|                                                                               | Chirazyme L-2, c.-f., C3, Lyo.                 | immobilized on the carrier-fixed (carrier 3)                                                             | 150 kU                                      | Roche                                     |
|                                                                               | CAL-B Sigma L4777                              | immobilized on the macroporous acrylic resin                                                             | ≥5,000 U/g                                  | Sigma Aldrich (cat. nr.: L4777)           |
|                                                                               | Novozym 435-STREM                              | immobilized on the macroporous acrylic resin                                                             | 10000 PLU/g                                 | STREM Chemicals, INC. (cat. nr.: 06-3123) |
|                                                                               | CAL-B-Immobead 150                             | immobilized on Immobead 150                                                                              | ≥1800 U/g                                   | Sigma Aldrich (cat. nr.: 54326)           |
| Lipase from <i>Candida antarctica</i> A (CAL-A)                               | Chirazyme L-5                                  | native                                                                                                   | unspecified                                 | Boehringer Mannheim <sup>[b]</sup>        |
| Lipase from <i>Burkholderia</i> (formerly <i>Pseudomonas</i> ) <i>cepacia</i> | PS-Immobead 150                                | immobilized on Immobead 150                                                                              | ≥900 U/g                                    | Sigma Aldrich (cat. nr.: 54327)           |
|                                                                               | Amano PS                                       | native                                                                                                   | >23.000 U/g                                 | Amano Pharmaceutical Co., Ltd.            |
|                                                                               | Amano PS-IM                                    | immobilized on diatomite                                                                                 | 500 U/g                                     | Amano Pharmaceutical Co., Ltd.            |
|                                                                               | Amano PS-C II                                  | immobilized on ceramic                                                                                   | ≥30.000 U/g                                 | Amano Pharmaceutical Co., Ltd.            |
| Lipase from <i>Pseudomonas fluorescens</i>                                    | Amano AK                                       | native                                                                                                   | >20.000 U/g                                 | Amano Pharmaceutical Co., Ltd.            |
| Lipase from <i>Thermomyces lanuginosus</i>                                    | TL-Immobead 150                                | immobilized on Immobead 150                                                                              | ≥3000 U/g                                   | Sigma Aldrich (cat. nr.: 76546)           |
|                                                                               | Lipozyme TL IM                                 | immobilized on a non-compressible silica gel carrier into an immobilized granulate (a silica granulated) | 170 IUN/g                                   | Novozymes A/S (Bagsvaerd, Denmark)        |
| Lipase from <i>Rhizomucor miehei</i>                                          | Lipozyme RM IM                                 | immobilized (unspecified carrier)                                                                        | 150 IU/g                                    | Novozymes A/S (Bagsvaerds, Denmark)       |
| Lipase from <i>Alcaligenes</i> sp.                                            | Chirazyme L-10                                 | native                                                                                                   | unspecified                                 | Boehringer Mannheim <sup>[b]</sup>        |
| Lipase from <i>Mucor javanicus</i>                                            | Amano Lipase M                                 | native                                                                                                   | >10.000 U/g                                 | Sigma Aldrich (cat. nr.: 534803)          |
| Lipase from <i>Rhizopus oryzae</i>                                            | Amano Lipase F-AP15                            | native                                                                                                   | ≥150.000 U/g                                | Sigma Aldrich (cat. nr.: 534811)          |
| Lipase from <i>Penicillium camemberti</i>                                     | Lipase G50 Amano                               | native                                                                                                   | ≥50 U/mg                                    | Sigma Aldrich (cat. nr.: 96888)           |
| Lipase from <i>Candida rugosa</i>                                             | Lipase AY Amano 30                             | native                                                                                                   | >30.000 U/g                                 | Amano Pharmaceutical Co., Ltd.            |
|                                                                               | Lipase Type VII                                | native                                                                                                   | ≥700 unit/mg                                | Sigma Aldrich (cat. nr.: L1754)           |
|                                                                               | Chirazyme L-3                                  | native                                                                                                   | unspecified                                 | Boehringer Mannheim <sup>[b]</sup>        |
| Lipase from <i>Geotrichum candidum</i>                                        | Chirazyme L-8                                  | native                                                                                                   | unspecified                                 | Boehringer Mannheim <sup>[b]</sup>        |
| Lipase A from <i>Aspergillus niger</i>                                        | Amano A                                        | native                                                                                                   | ≥120,000 U/g                                | Sigma Aldrich (cat. nr.: 534781)          |
| Esterase from porcine liver                                                   | PLE                                            | native                                                                                                   | ≥50 U/mg                                    | Sigma Aldrich (cat. nr.: 46058)           |

[a] All commercial formulations of enzymes studied herein were used without pre-treatment.

[b] Currently: Roche Diagnostics.

**Table S2. The results of specific rotation values for the EKR products.**

| Product of EKR                                                                                  | ee [%] | Measured<br>specific rotation<br>$[\alpha]_D$          | Literature<br>specific rotation<br>$[\alpha]_D^{\text{lit.}}$   | Ref. |
|-------------------------------------------------------------------------------------------------|--------|--------------------------------------------------------|-----------------------------------------------------------------|------|
| 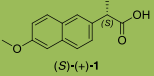<br>(S)-(+)-1  | 57     | $[\alpha]_D^{29} = +16.0$ (c 0.50, CHCl <sub>3</sub> ) | $[\alpha]_D^{20} = +65.5$ (c 1.00, CHCl <sub>3</sub> , 99% ee)  | [1]  |
| <br>(R)-(-)-1a | 29     | $[\alpha]_D^{29} = -45.0$ (c 1.00, CHCl <sub>3</sub> ) | $[\alpha]_D^{20} = -76.0$ (c 1.00, CHCl <sub>3</sub> , >95% ee) | [2]  |
| <br>(S)-(+)-2  | 56     | $[\alpha]_D^{24} = +28.5$ (c 1.00, EtOH)               | $[\alpha]_D^{25} = +58.2$ (c 1.00, EtOH, 99% ee)                | [1]  |
| <br>(R)-(-)-2b | 67     | $[\alpha]_D^{25} = -30.0$ (c 0.95, CHCl <sub>3</sub> ) | Lack of data                                                    | -    |
| <br>(S)-(+)-3  | 53     | $[\alpha]_D^{23} = +7.4$ (c 0.61, MeOH)                | $[\alpha]_D^{25} = +46.3$ (c 1.00, MeOH, 99.4% ee)              | [3]  |
| <br>(R)-(-)-3b | 21     | $[\alpha]_D^{26} = -11.5$ (c 1.44, CHCl <sub>3</sub> ) | Lack of data                                                    | -    |
| <br>(S)-(+)-4  | 23     | $[\alpha]_D^{25} = +8.9$ (c 1.02, CHCl <sub>3</sub> )  | $[\alpha]_D^{20} = +37.2$ (c 1.00, CHCl <sub>3</sub> , 98% ee)  | [4]  |
| <br>(R)-(-)-4b | 70     | $[\alpha]_D^{25} = -17.7$ (c 1.44, CHCl <sub>3</sub> ) | Lack of data                                                    | -    |

**Table S3. HPLC analytical separation conditions of NSAIDs and their esters by chiral columns – (S,S)-Whelk-O 1 or Chiralcel OJ-H or Chiralpak AD-H.**

| Compound                                                                                             | HPLC Column     | Mobile Phase               |                 | Flow Rate [mL/min] | Detection [nm] | Retention Time [min]                        |
|------------------------------------------------------------------------------------------------------|-----------------|----------------------------|-----------------|--------------------|----------------|---------------------------------------------|
|                                                                                                      |                 | <i>n</i> -Hexane/IPA [v/v] | Acidic Additive |                    |                |                                             |
| 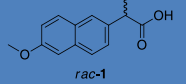<br><i>rac-1</i>    | (S,S)-Whelk-O 1 | 70:30                      | 0.1% AcOH       | 1.5                | 230            | 5.504 ( <i>R</i> ) and 8.216 ( <i>S</i> )   |
| <br><i>rac-1a</i>   | (S,S)-Whelk-O 1 | 70:30                      | -               | 1.5                | 230            | 9.797 ( <i>R</i> ) and 12.541 ( <i>S</i> )  |
| <br><i>rac-1b</i>   | (S,S)-Whelk-O 1 | 70:30                      | -               | 1.5                | 230            | 8.975 ( <i>R</i> ) and 11.542 ( <i>S</i> )  |
| <br><i>rac-2</i>    | Chiralcel OJ-H  | 98:2                       | 0.05% TFA       | 1.0                | 216            | 8.616 ( <i>R</i> ) and 9.415 ( <i>S</i> )   |
| <br><i>rac-2a</i>  | Chiralcel OJ-H  | 99:1                       | -               | 0.7                | 217            | 10.393 ( <i>S</i> ) and 13.210 ( <i>R</i> ) |
| <br><i>rac-2b</i> | Chiralcel OJ-H  | 99:1                       | -               | 0.7                | 217            | 8.465 ( <i>S</i> ) and 10.159 ( <i>R</i> )  |
| <br><i>rac-3</i>  | Chiralcel OJ-H  | 96:4                       | 0.1% TFA        | 0.8                | 250            | 34.018 ( <i>S</i> ) and 44.343 ( <i>R</i> ) |
| <br><i>rac-3a</i> | Chiralpak AD-H  | 99:1                       | -               | 0.7                | 249            | 29.146 ( <i>S</i> ) and 30.214 ( <i>R</i> ) |
| <br><i>rac-3b</i> | Chiralcel OJ-H  | 99:1                       | -               | 0.7                | 249            | 30.411 ( <i>S</i> ) and 31.951 ( <i>R</i> ) |
| <br><i>rac-4</i>  | Chiralcel OJ-H  | 96.5:3.5                   | 0.2% TFA        | 0.5                | 246            | 40.346 ( <i>S</i> ) and 43.773 ( <i>R</i> ) |
| <br><i>rac-4a</i> | Chiralcel OJ-H  | 99:1                       | -               | 0.7                | 246            | 29.847 ( <i>S</i> ) and 35.927 ( <i>R</i> ) |
| <br><i>rac-4b</i> | Chiralcel OJ-H  | 99:1                       | -               | 0.7                | 246            | 19.916 ( <i>S</i> ) and 26.663 ( <i>R</i> ) |
| <br><i>rac-5</i>  | Chiralcel OJ-H  | 95:5                       | 0.05% TFA       | 1.0                | 230            | 10.252 and 11.657                           |

## HPLC analytical separation for both enantiomers of naproxen (*rac*-1) using (*S,S*)-Whelk-O1

HPLC conditions: *n*-hexane-2-PrOH-AcOH (70:30:0.1, v/v/v); *f*=1.5 mL/min;  $\lambda$ =230 nm; *T*=30 °C.

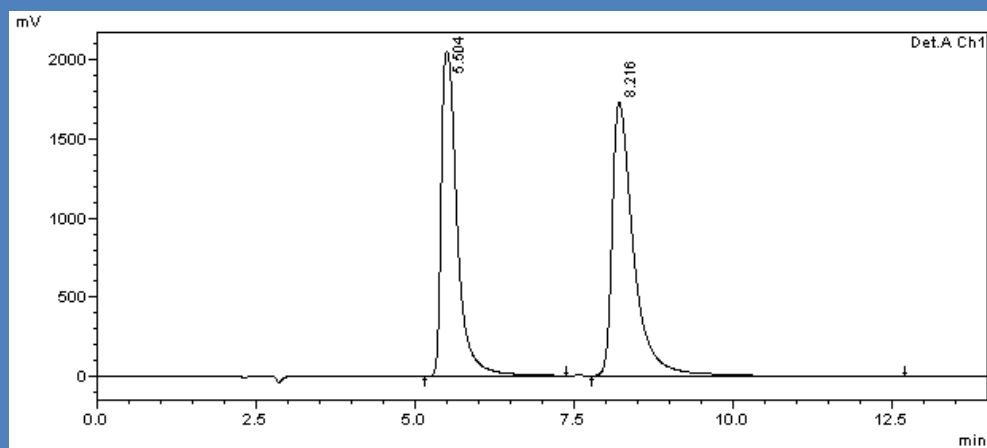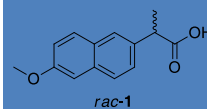

1 Det.A Ch1/230nm

PeakTable

Detector A Ch1 230nm

| Peak# | Ret. Time | Area     | Height  | Area %  | Height % |
|-------|-----------|----------|---------|---------|----------|
| 1     | 5.504     | 35852166 | 2051776 | 46.942  | 54.352   |
| 2     | 8.216     | 40522687 | 1723233 | 53.058  | 45.648   |
| Total |           | 76374852 | 3775008 | 100.000 | 100.000  |

## HPLC analytical separation for (*S*)-(+)-1 (63% ee) obtained from EKR.

HPLC conditions: *n*-hexane-2-PrOH-AcOH (70:30:0.1, v/v/v); *f*=1.5 mL/min;  $\lambda$ =230 nm; *T*=30 °C.

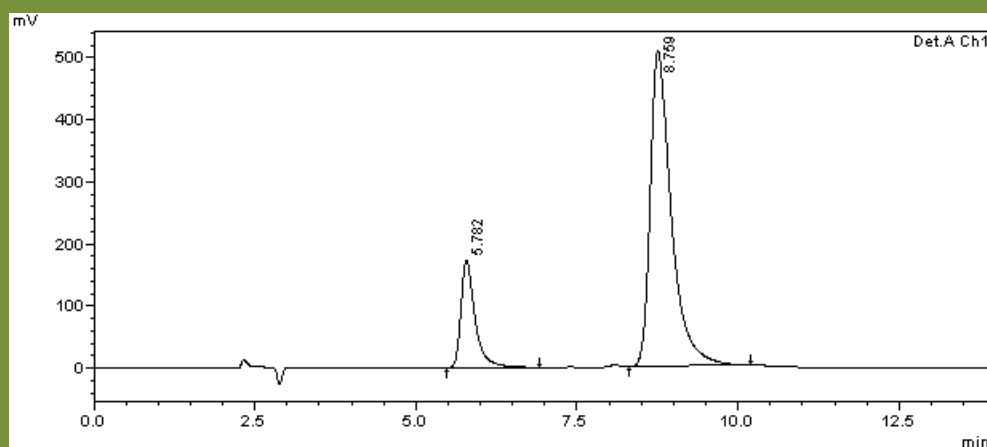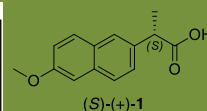

1 Det.A Ch1/230nm

PeakTable

Detector A Ch1 230nm

| Peak# | Ret. Time | Area     | Height | Area %  | Height % |
|-------|-----------|----------|--------|---------|----------|
| 1     | 5.782     | 2652284  | 172860 | 18.716  | 25.360   |
| 2     | 8.759     | 11518605 | 508759 | 81.284  | 74.640   |
| Total |           | 14170889 | 681619 | 100.000 | 100.000  |

## HPLC separation for both enantiomers of naproxen methyl ester (*rac*-1a) using (*S,S*)-Whelk-O1

HPLC conditions: *n*-hexane-2-PrOH (70:30, v/v); *f*=1.5 mL/min;  $\lambda$ =230 nm; *T*=30 °C.

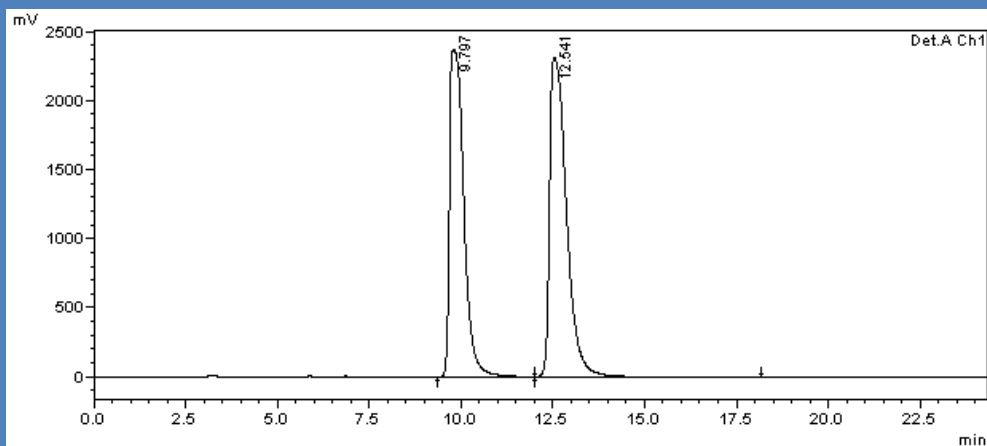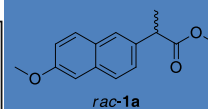

1 Det.A Ch1/230nm

Peak Table

Detector A Ch1 230nm

| Peak# | Ret. Time | Area      | Height  | Area %  | Height % |
|-------|-----------|-----------|---------|---------|----------|
| 1     | 9.797     | 64669521  | 2371479 | 46.635  | 50.643   |
| 2     | 12.541    | 74002036  | 2311214 | 53.365  | 49.357   |
| Total |           | 138671558 | 4682693 | 100.000 | 100.000  |

## HPLC analytical separation for (*R*)-(-)-1a (86% ee) obtained from EKR.

HPLC conditions: *n*-hexane-2-PrOH (70:30, v/v); *f*=1.5 mL/min;  $\lambda$ =230 nm; *T*=30 °C.

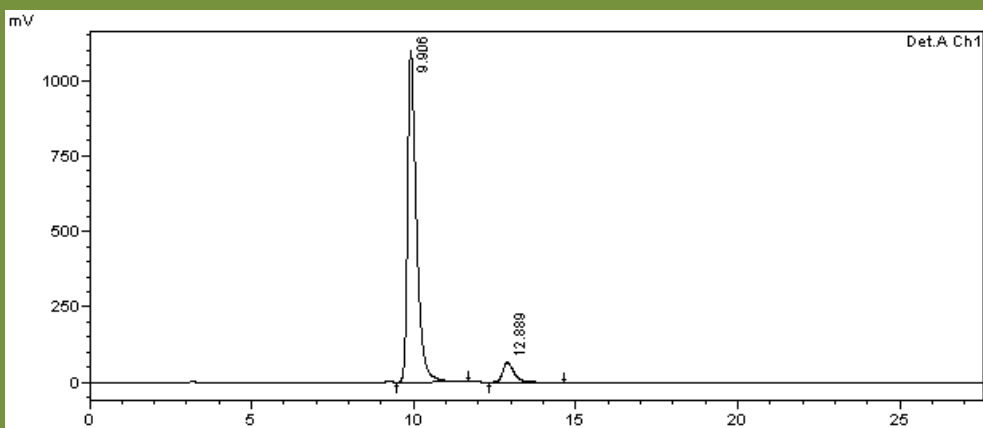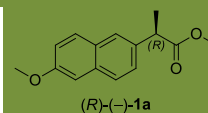

1 Det.A Ch1/230nm

Peak Table

Detector A Ch1 230nm

| Peak# | Ret. Time | Area     | Height  | Area %  | Height % |
|-------|-----------|----------|---------|---------|----------|
| 1     | 9.906     | 20754586 | 1097430 | 92.880  | 94.387   |
| 2     | 12.889    | 1591074  | 65262   | 7.120   | 5.613    |
| Total |           | 22345661 | 1162692 | 100.000 | 100.000  |

## HPLC analytical separation for both enantiomers of naproxen ethyl ester (*rac*-1b) using (*S,S*)-Whelk-O1

HPLC conditions: *n*-hexane-2-PrOH (70:30, v/v); *f*=1.5 mL/min;  $\lambda$ =230 nm; *T*=30 °C.

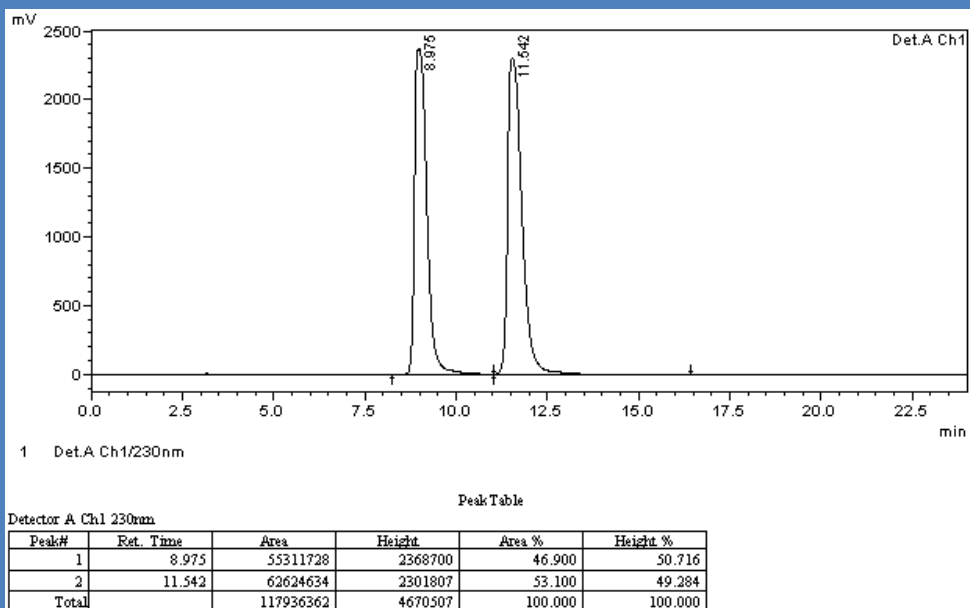

## HPLC analytical separation for (*R*)-(-)-1b (62% ee) obtained from EKR.

HPLC conditions: *n*-hexane-2-PrOH (70:30, v/v); *f*=1.5 mL/min;  $\lambda$ =230 nm; *T*=30 °C.

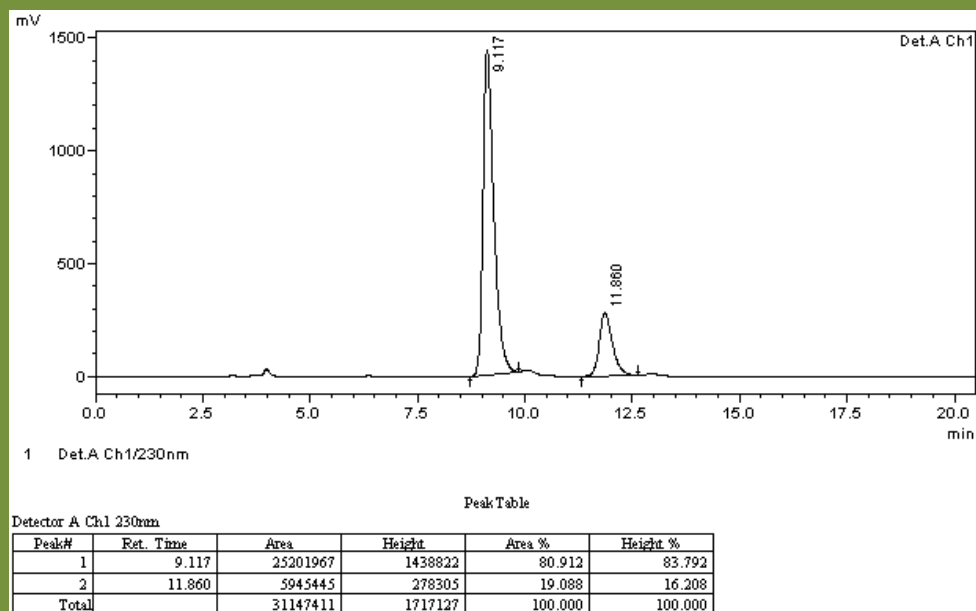

## HPLC analytical separation for both enantiomers of ibuprofen (*rac*-2) using Chiralcel OJ-H

HPLC conditions: *n*-hexane-2-PrOH-TFA (98:2:0.05, v/v/v); *f*=1.0 mL/min;  $\lambda$ =216 nm; *T*=30 °C.

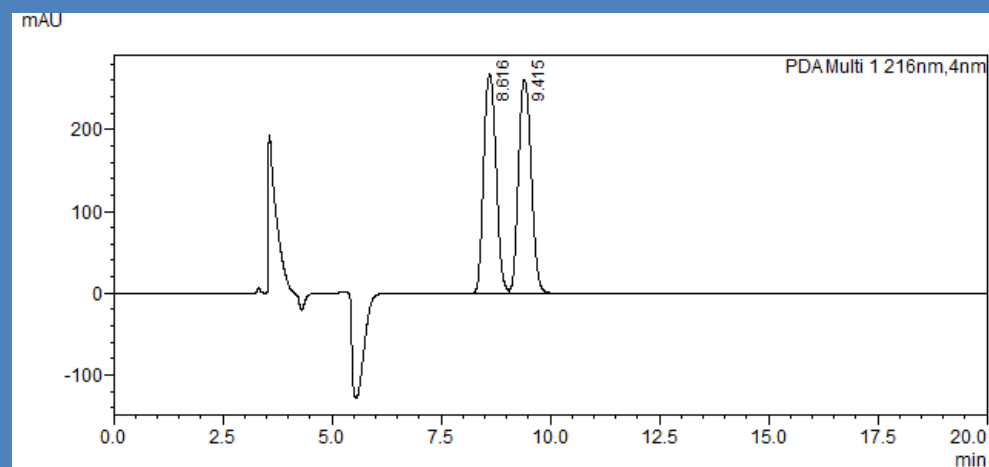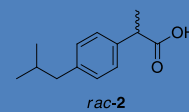

### <Peak Table>

PDA Ch1 216nm

| Peak# | Ret. Time | Area     | Height | Area%   | Height% |
|-------|-----------|----------|--------|---------|---------|
| 1     | 8.616     | 5291757  | 267670 | 49.889  | 50.616  |
| 2     | 9.415     | 5315213  | 261152 | 50.111  | 49.384  |
| Total |           | 10606970 | 528821 | 100.000 | 100.000 |

## HPLC analytical separation for (*S*)-(+)-2 (91% ee) obtained from EKR.

HPLC conditions: *n*-hexane-2-PrOH-TFA (98:2:0.05, v/v/v); *f*=1.0 mL/min;  $\lambda$ =216 nm; *T*=30 °C.

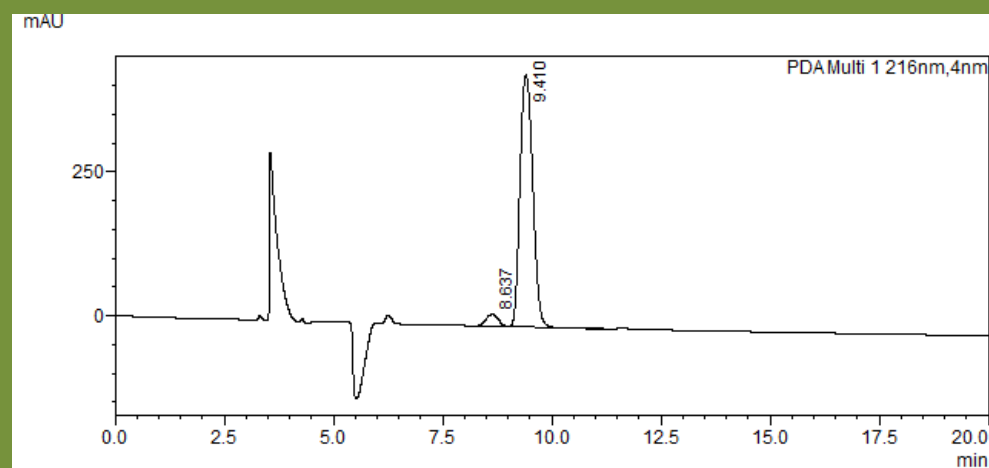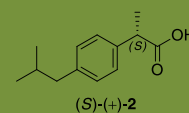

### <Peak Table>

PDA Ch1 216nm

| Peak# | Ret. Time | Area    | Height | Area%   | Height% |
|-------|-----------|---------|--------|---------|---------|
| 1     | 8.637     | 408944  | 20594  | 4.383   | 4.494   |
| 2     | 9.410     | 8921888 | 437698 | 95.617  | 95.506  |
| Total |           | 9330832 | 458292 | 100.000 | 100.000 |



## HPLC separation for both enantiomers of ibuprofen methyl ester (*rac*-2a) using Chiralcel OJ-H

HPLC conditions: *n*-hexane-2-PrOH (99:1, v/v); *f*=0.7 mL/min;  $\lambda$ =217 nm; *T*=30 °C.

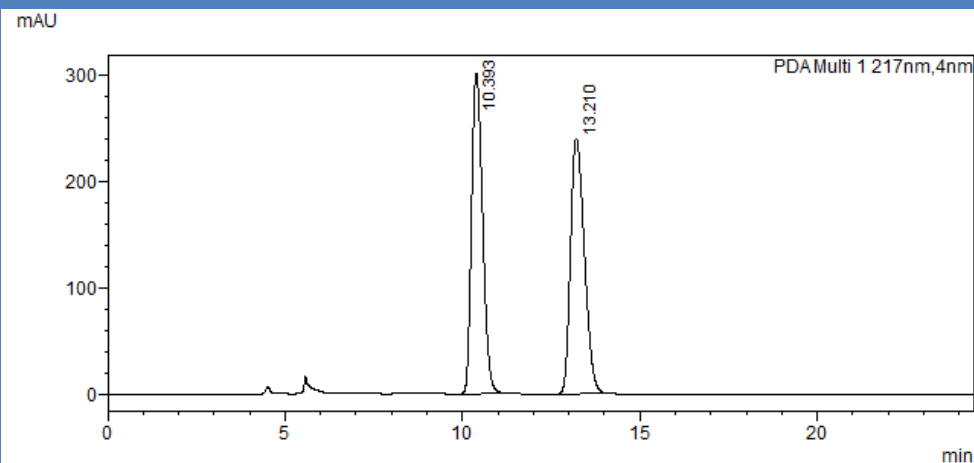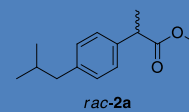

### <Peak Table>

PDA Ch1 217nm

| Peak# | Ret. Time | Area     | Height | Area%   | Height% |
|-------|-----------|----------|--------|---------|---------|
| 1     | 10.393    | 6500700  | 300668 | 49.987  | 55.606  |
| 2     | 13.210    | 6504064  | 240045 | 50.013  | 44.394  |
| Total |           | 13004765 | 540713 | 100.000 | 100.000 |

## HPLC analytical separation for (*R*)-(-)-2a (66% ee) obtained from EKR.

HPLC conditions: *n*-hexane-2-PrOH (99:1, v/v); *f*=0.7 mL/min;  $\lambda$ =217 nm; *T*=30 °C.

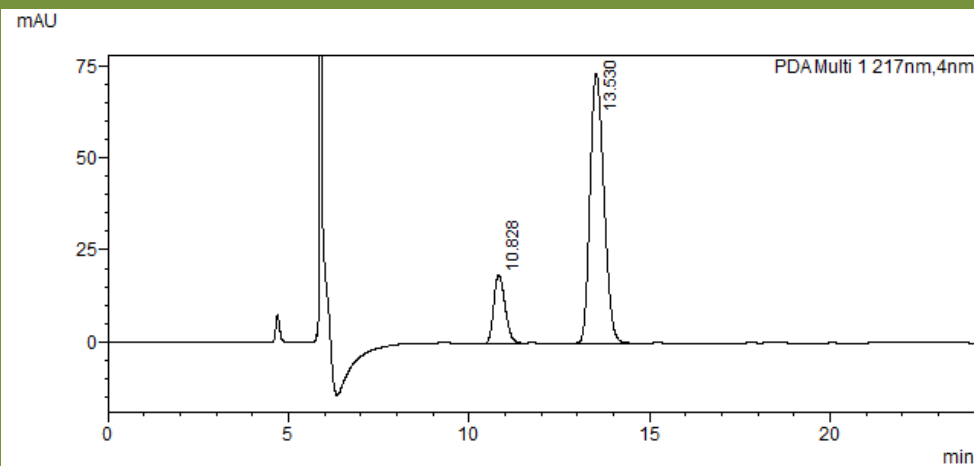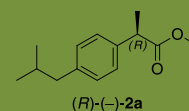

### <Peak Table>

PDA Ch1 217nm

| Peak# | Ret. Time | Area    | Height | Area%   | Height% |
|-------|-----------|---------|--------|---------|---------|
| 1     | 10.828    | 405083  | 18690  | 17.158  | 20.367  |
| 2     | 13.530    | 1955843 | 73076  | 82.842  | 79.633  |
| Total |           | 2360926 | 91767  | 100.000 | 100.000 |

# HPLC analytical separation for both enantiomers of ibuprofen ethyl ester (*rac*-2b) using Chiralcel OJ-H

HPLC conditions: *n*-hexane-2-PrOH (99:1, v/v); *f*=0.7 mL/min;  $\lambda$ =217 nm; *T*=30 °C.

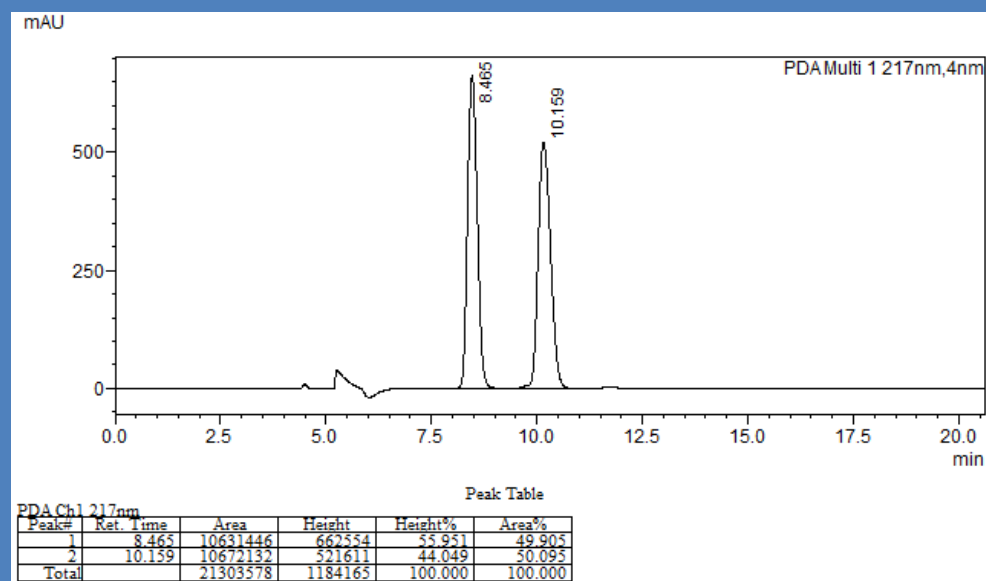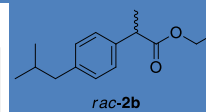

## HPLC analytical separation for (*R*)-(-)-2b (75% ee) obtained from EKR.

HPLC conditions: *n*-hexane-2-PrOH (99:1, v/v); *f*=0.7 mL/min;  $\lambda$ =217 nm; *T*=30 °C.

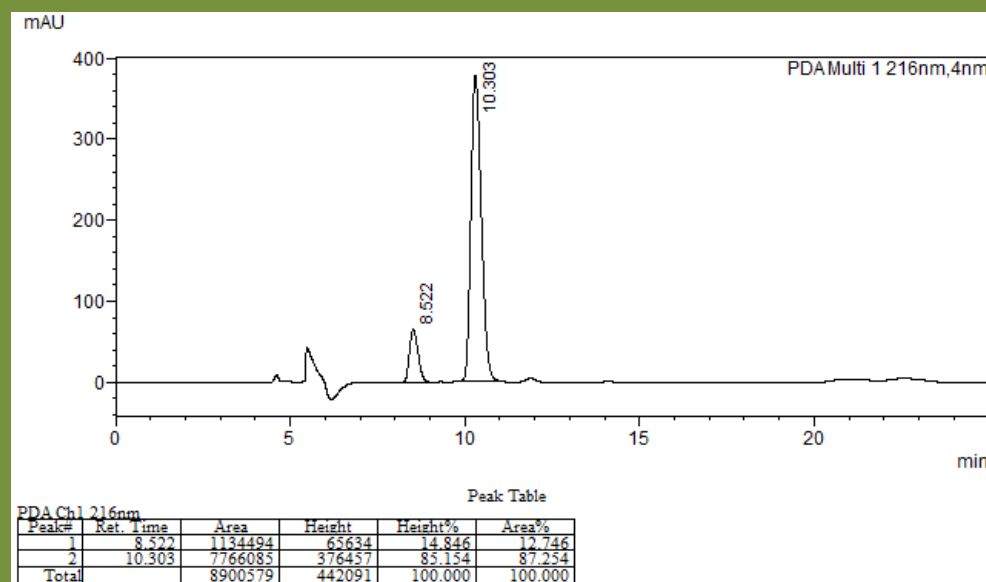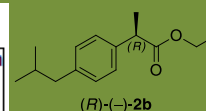

## HPLC analytical separation for both enantiomers of ketoprofen (*rac*-3) using Chiralcel OJ-H

HPLC conditions: *n*-hexane-2-PrOH-TFA (96:4:0.1, v/v/v); *f*=0.8 mL/min;  $\lambda$ =250 nm; *T*=30 °C.

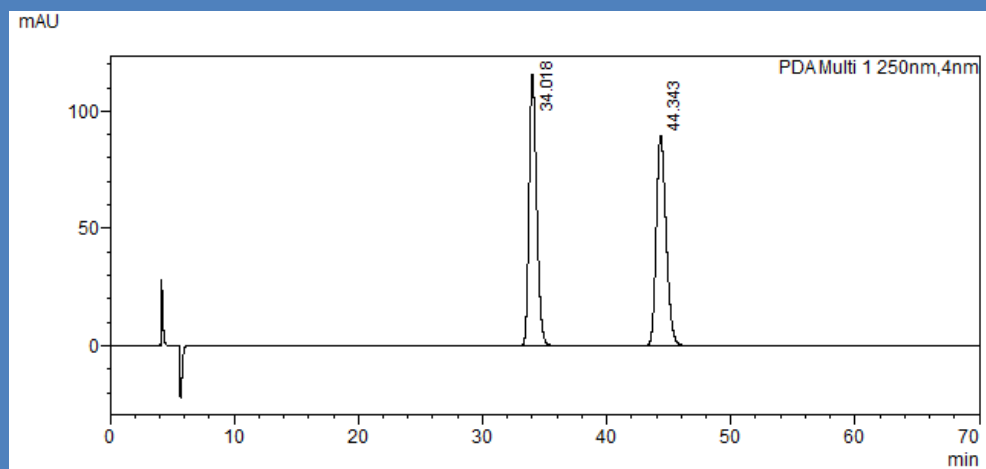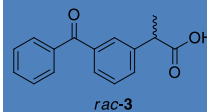

### <Peak Table>

PDA Ch1 250nm

| Peak# | Ret. Time | Area    | Height | Area%   | Height% |
|-------|-----------|---------|--------|---------|---------|
| 1     | 34.018    | 4909515 | 115394 | 49.993  | 56.307  |
| 2     | 44.343    | 4910983 | 89544  | 50.007  | 43.693  |
| Total |           | 9820498 | 204938 | 100.000 | 100.000 |

## HPLC analytical separation for (*S*)-(+)-3 (69% ee) obtained from EKR.

HPLC conditions: *n*-hexane-2-PrOH-TFA (96:4: 0.1, v/v/v); *f*=0.8 mL/min;  $\lambda$ =250 nm; *T*=30 °C.

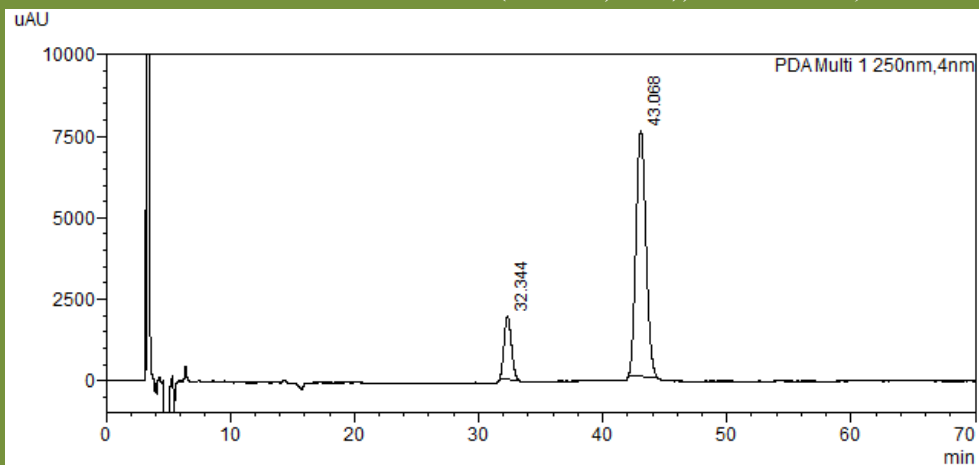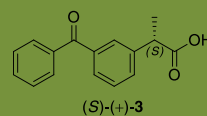

PDA Ch1 250nm

| Peak# | Ret. Time | Area   | Height | Height% | Area%   |
|-------|-----------|--------|--------|---------|---------|
| 1     | 32.344    | 78033  | 1927   | 20.282  | 15.582  |
| 2     | 43.068    | 422754 | 7573   | 79.718  | 84.418  |
| Total |           | 500786 | 9500   | 100.000 | 100.000 |

## HPLC separation for both enantiomers of ketoprofen ethyl ester (*rac*-3b) using Chiralcel OJ-H

HPLC conditions: *n*-hexane-2-PrOH (99:1, v/v); *f*=0.7 mL/min;  $\lambda$ =249 nm; *T*=30 °C.

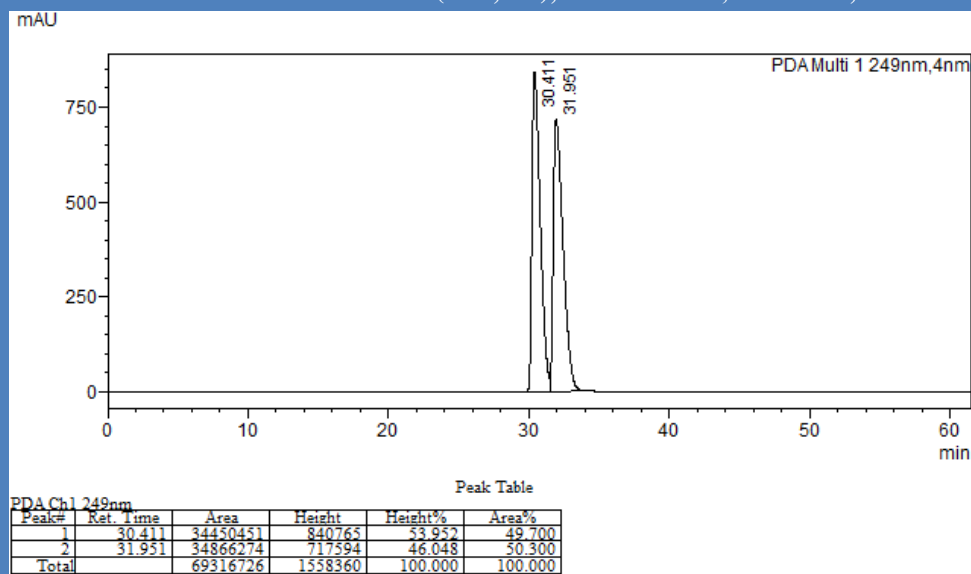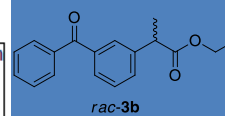

## HPLC analytical separation for (*R*)-(-)-3b (25% ee) obtained from EKR.

HPLC conditions: *n*-hexane-2-PrOH (99:1, v/v); *f*=0.7 mL/min;  $\lambda$ =249 nm; *T*=30 °C.

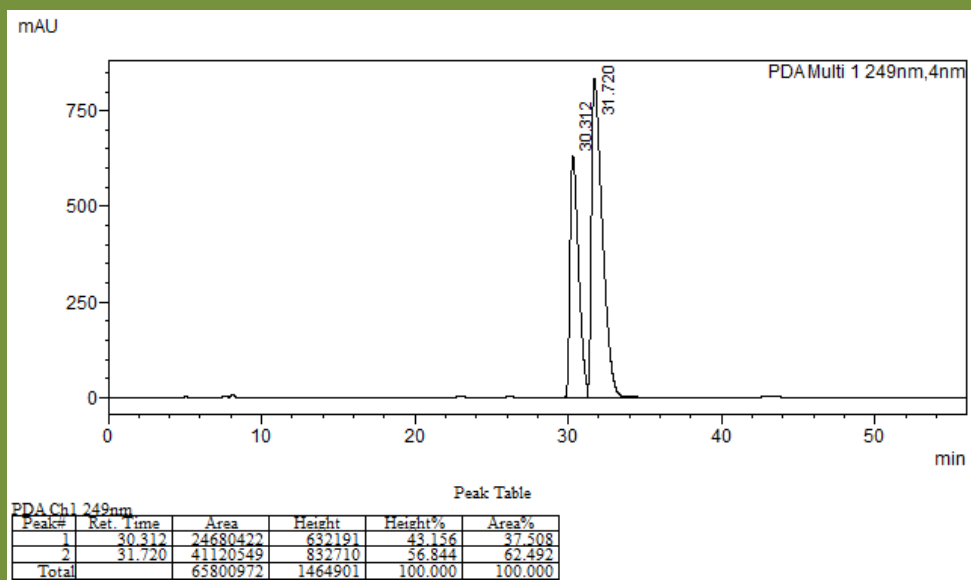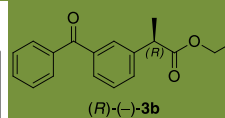

## HPLC analytical separation for both enantiomers of flurbiprofen (*rac*-4) using Chiralcel OJ-H

HPLC conditions: *n*-hexane-2-PrOH-TFA (96.5:3.5:0.2, v/v/v); f=0.5 mL/min;  $\lambda$ =246 nm;  $T$ =30 °C.

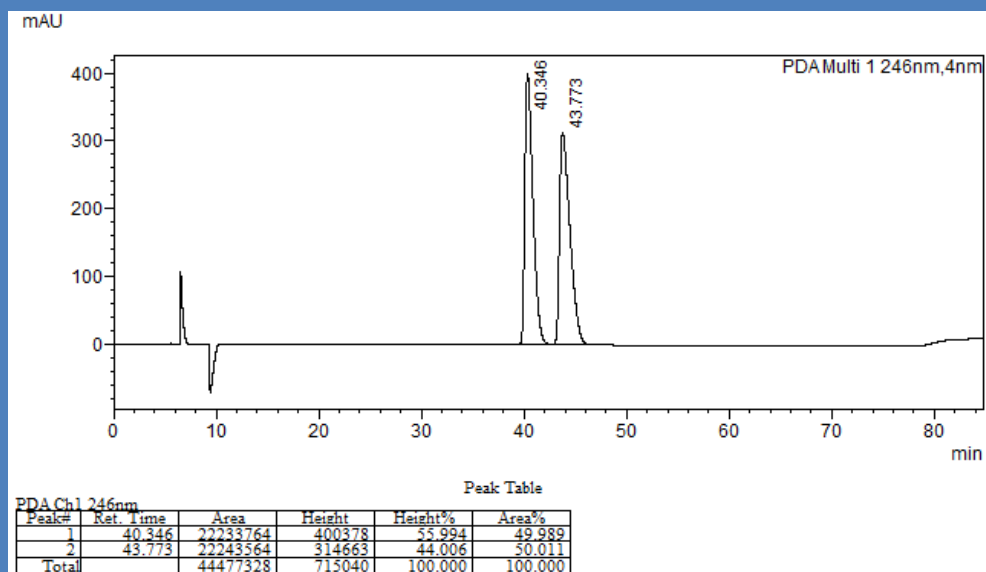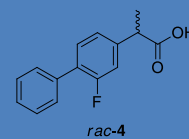

## HPLC analytical separation for (*S*)-(+)-4 (97% ee) obtained from EKR.

HPLC conditions: *n*-hexane-2-PrOH-TFA (96.5:3.5:0.2, v/v/v); f=0.5 mL/min;  $\lambda$ =246 nm;  $T$ =30 °C.

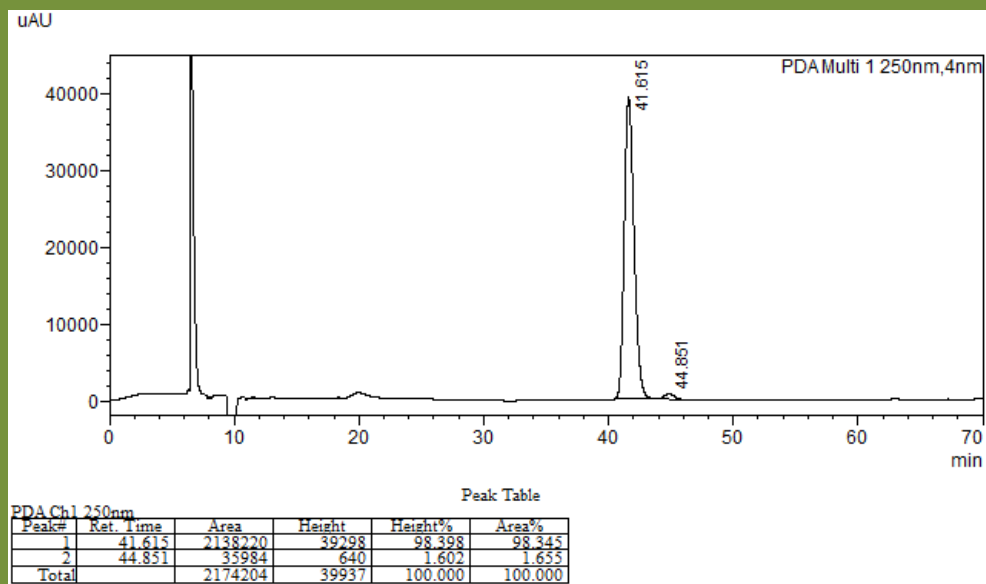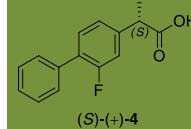

## HPLC separation for both enantiomers of flurbiprofen ethyl ester (*rac*-4b) using Chiralcel OJ-H

HPLC conditions: *n*-hexane-2-PrOH (99:1, v/v); *f*=0.7 mL/min;  $\lambda$ =246 nm; *T*=30 °C.

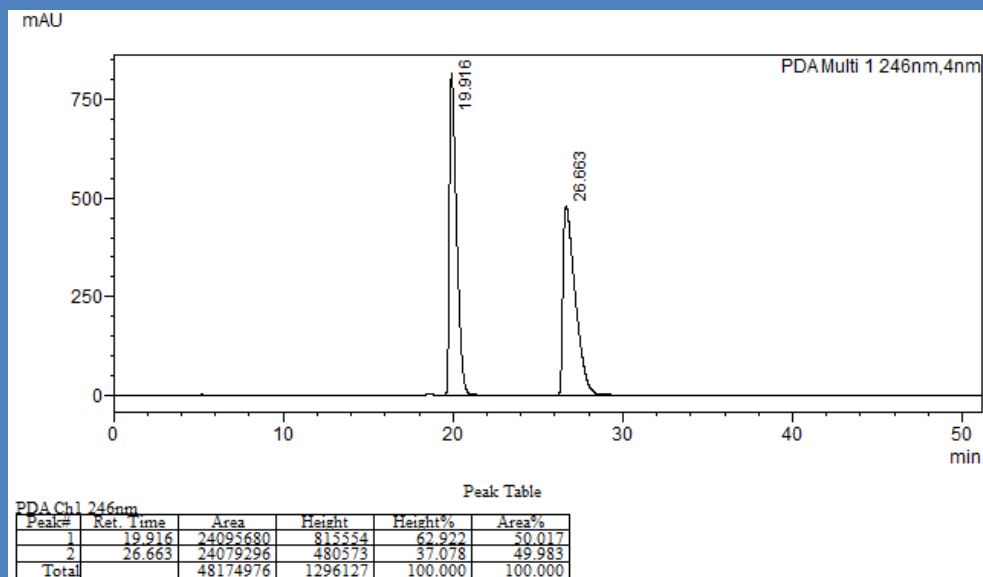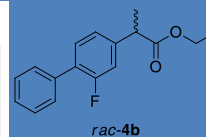

## HPLC analytical separation for (*R*)-(-)-4b (71% ee) obtained from EKR.

HPLC conditions: *n*-hexane-2-PrOH (99:1, v/v); *f*=0.7 mL/min;  $\lambda$ =246 nm; *T*=30 °C.

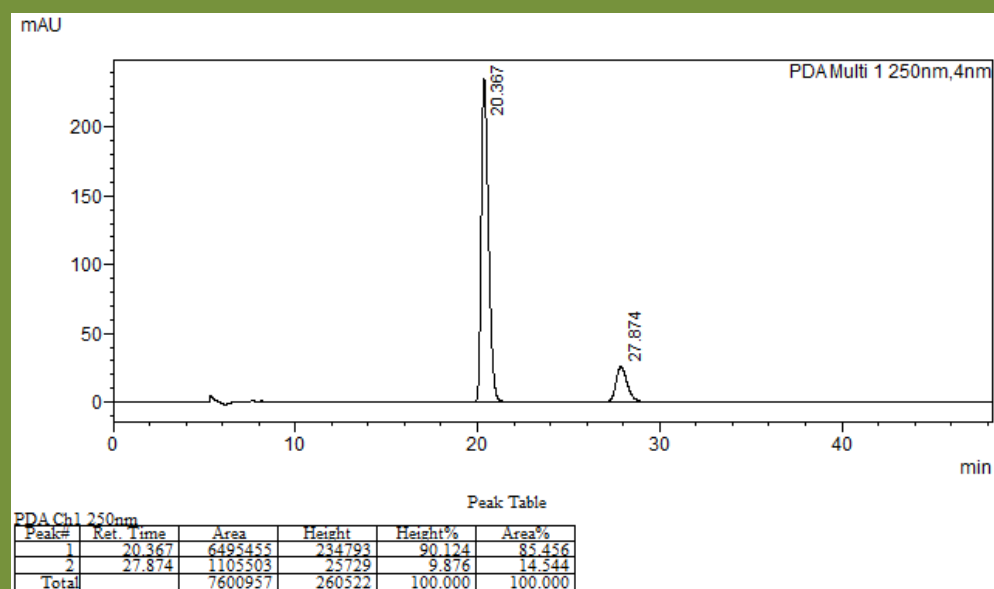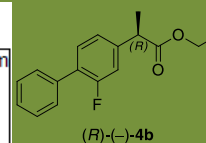

**Methyl 2-(6-methoxynaphthalen-2-yl)propanoate (Naproxen methyl ester, *rac*-1a)**

$^1\text{H}$  NMR spectrum of *rac*-1a (500 MHz,  $\text{CDCl}_3$ )

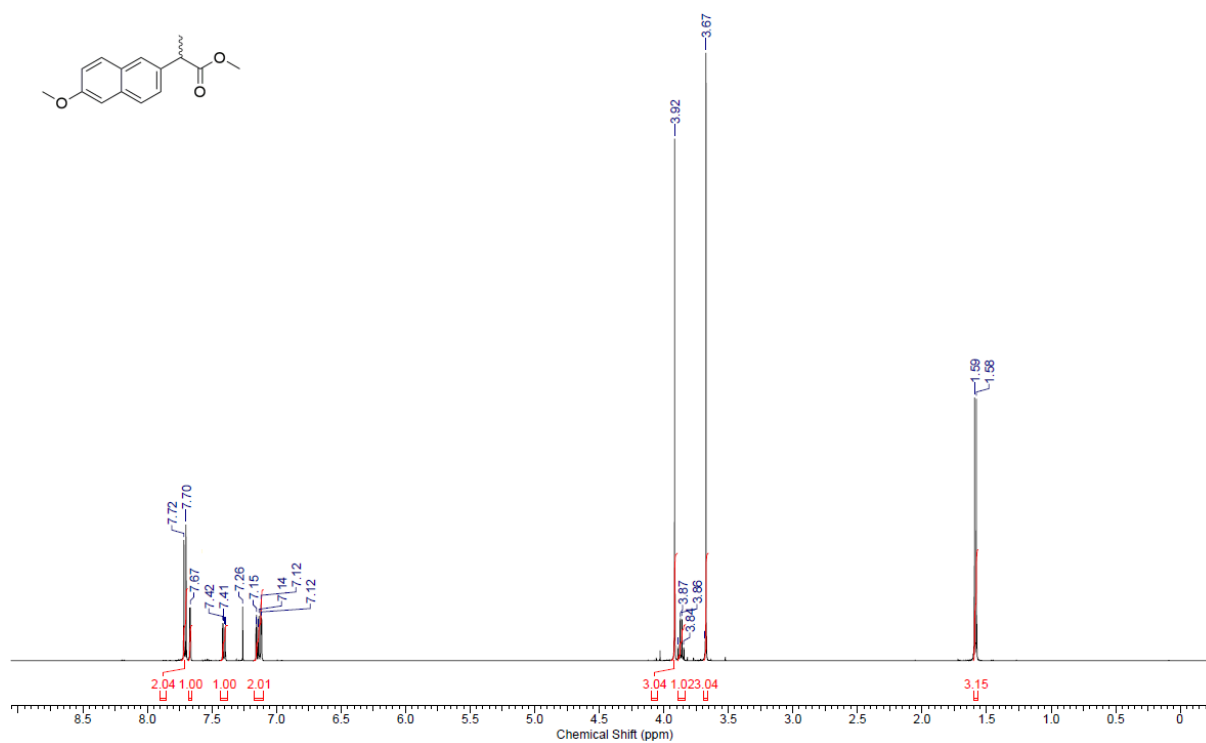

$^{13}\text{C}$  NMR spectrum of *rac*-1a (126 MHz,  $\text{CDCl}_3$ )

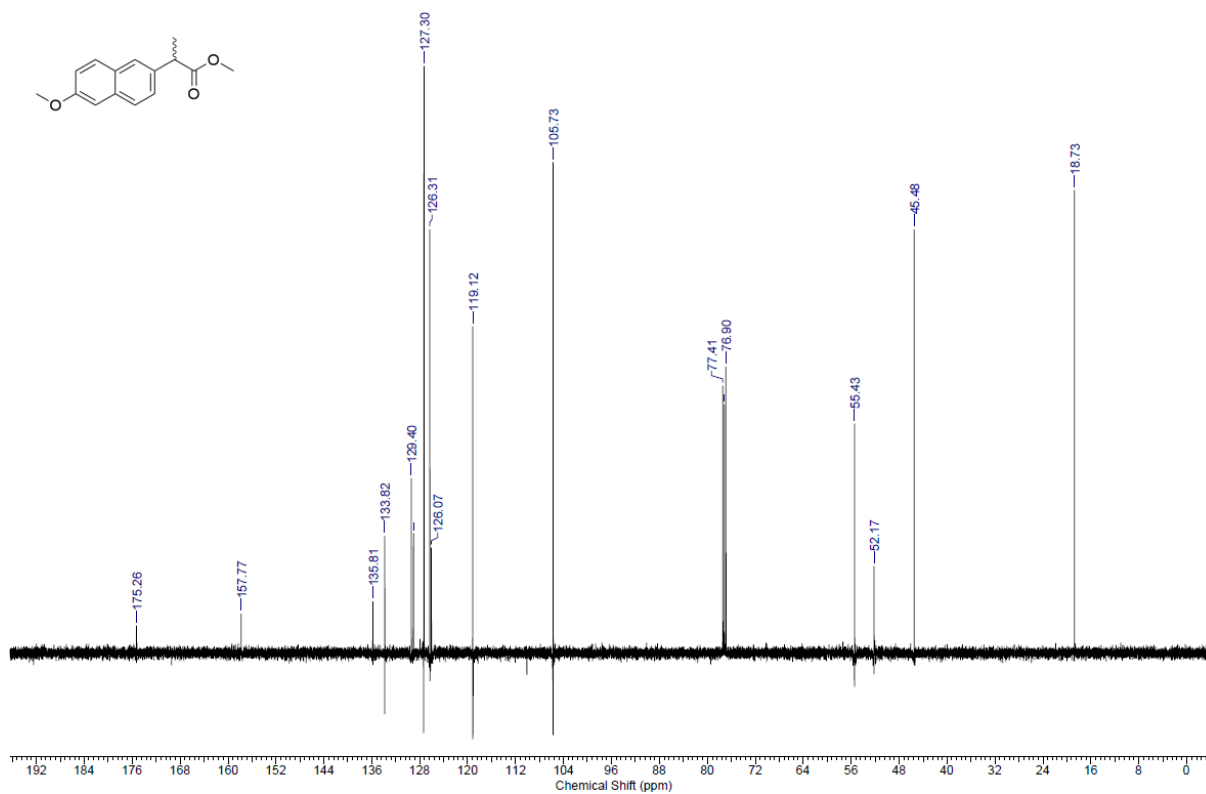

FTIR spectrum of *rac*-**1a** (Mineral oil, Nujol)

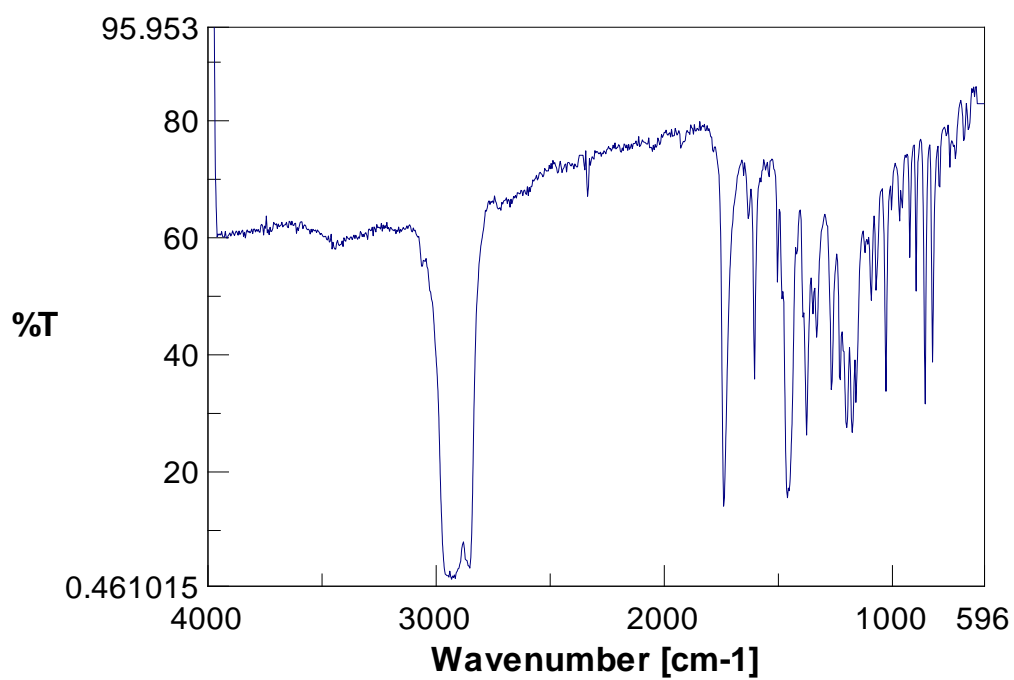

MS spectrum of *rac*-**1a** (ESI-TOF)

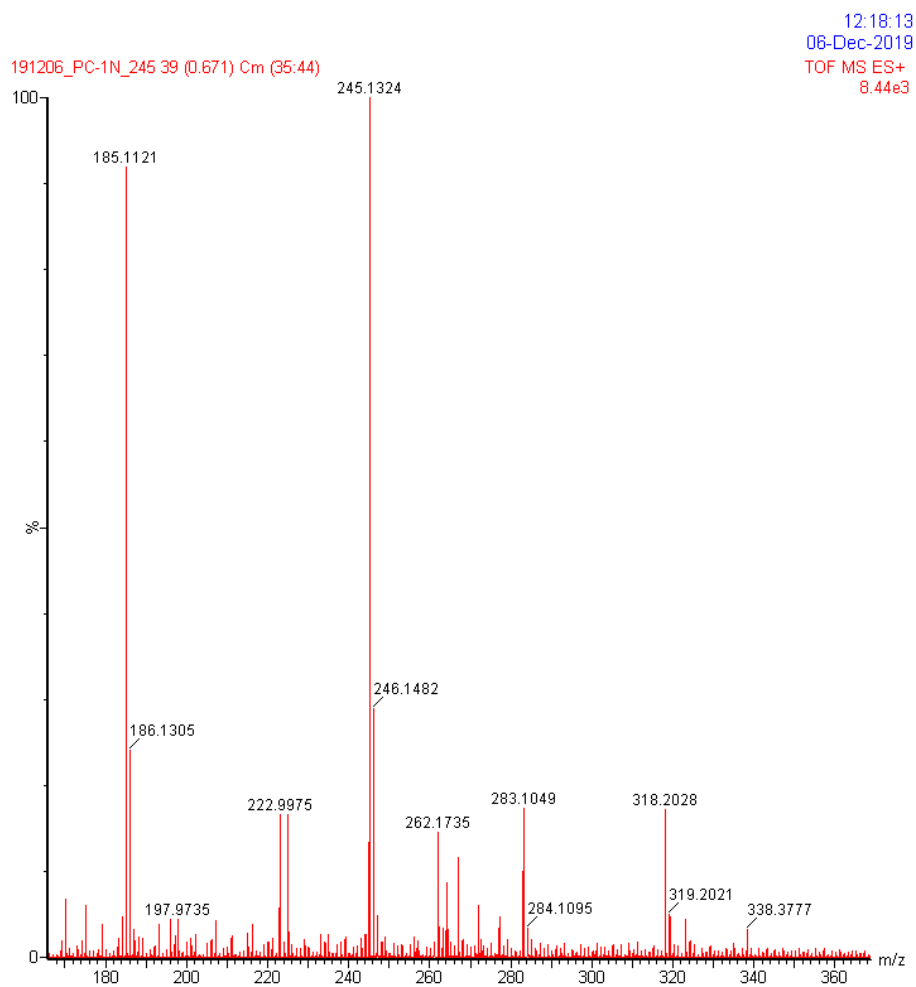



# FTMS spectrum of *rac*-**1a** (ESI-TOF)

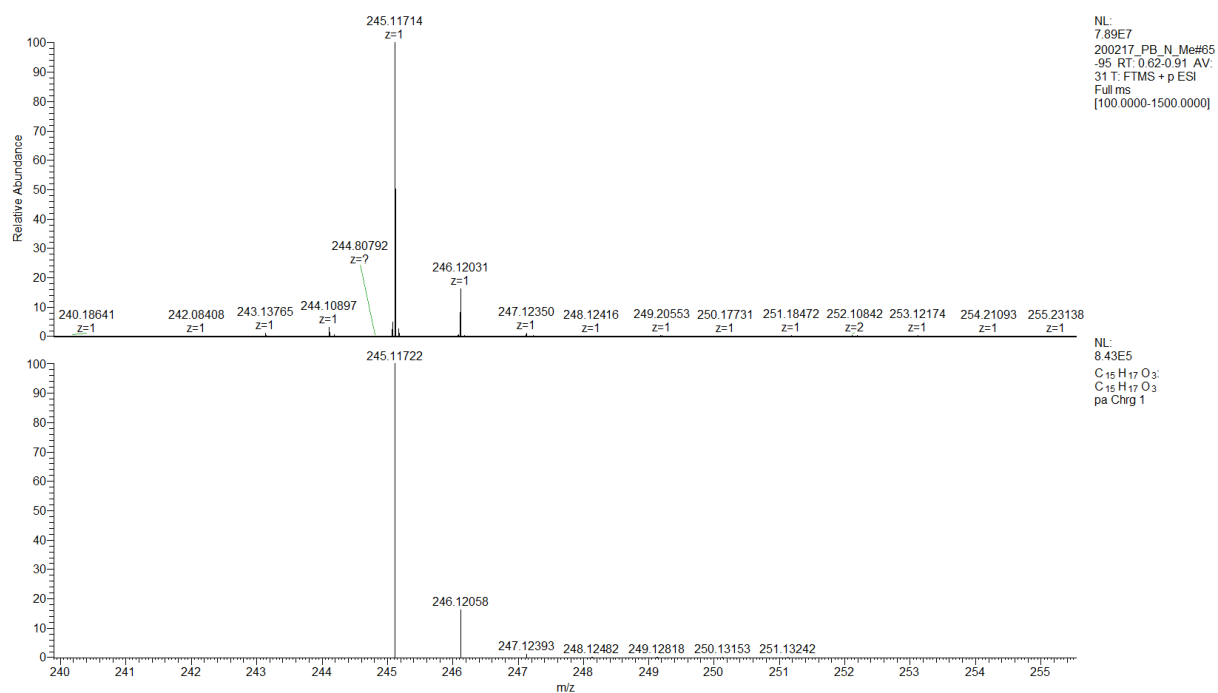

***Ethyl 2-(6-methoxynaphthalen-2-yl)propanoate (Naproxen ethyl ester, rac-1b)***

$^1\text{H}$  NMR spectrum of *rac-1b* (500 MHz,  $\text{CDCl}_3$ )

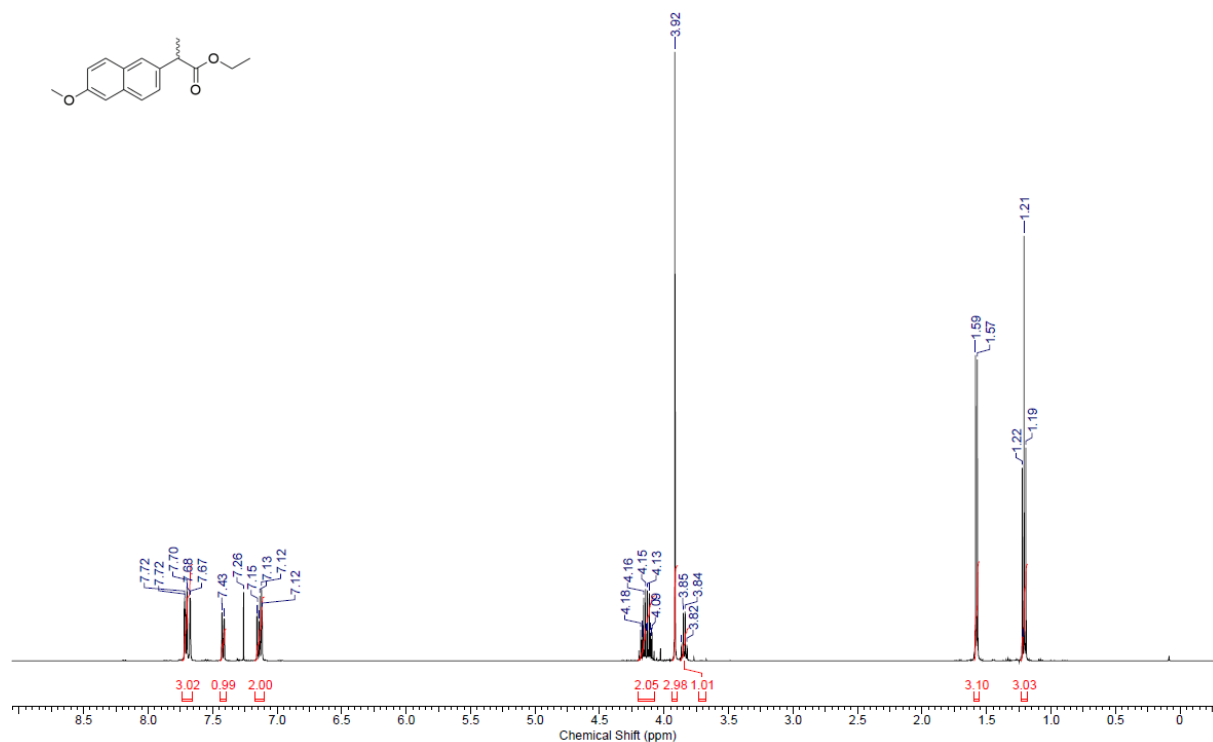

$^{13}\text{C}$  NMR spectrum of *rac-1b* (126 MHz,  $\text{CDCl}_3$ )

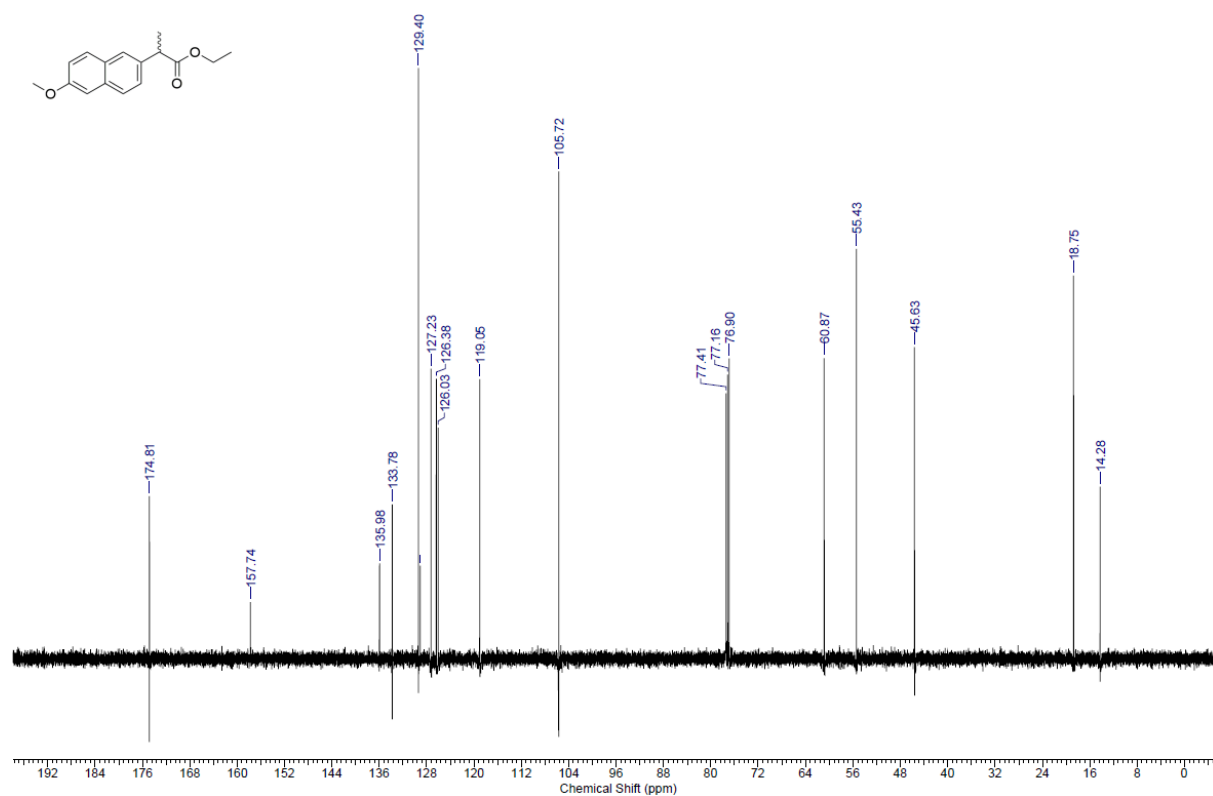

FTIR spectrum of *rac*-**1b** (Mineral oil, Nujol)

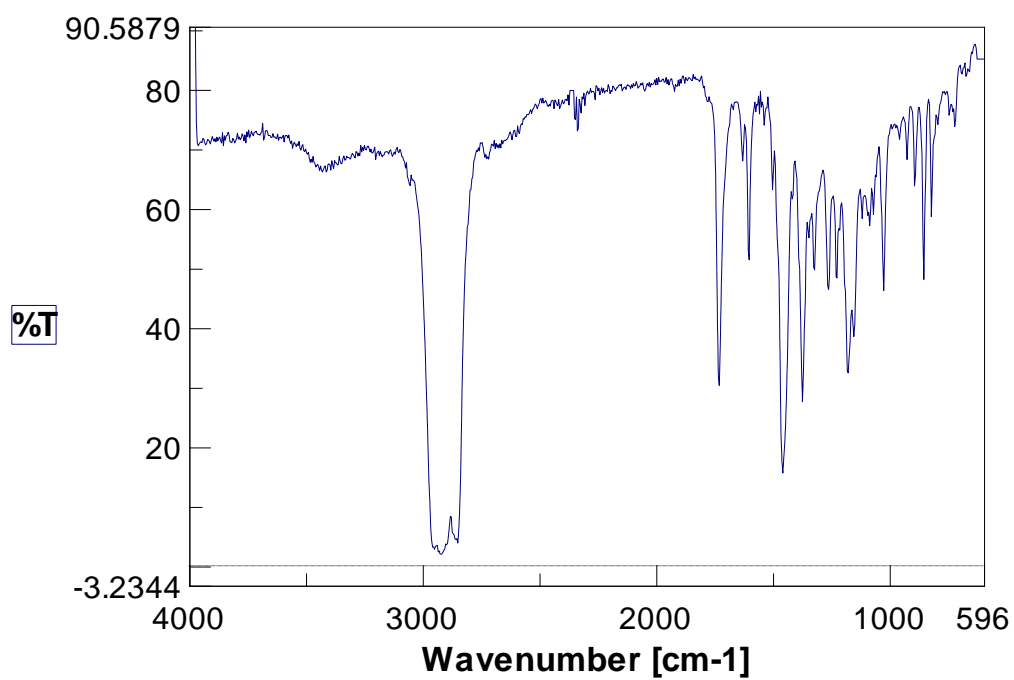

MS spectrum of *rac*-**1b** (ESI-TOF)

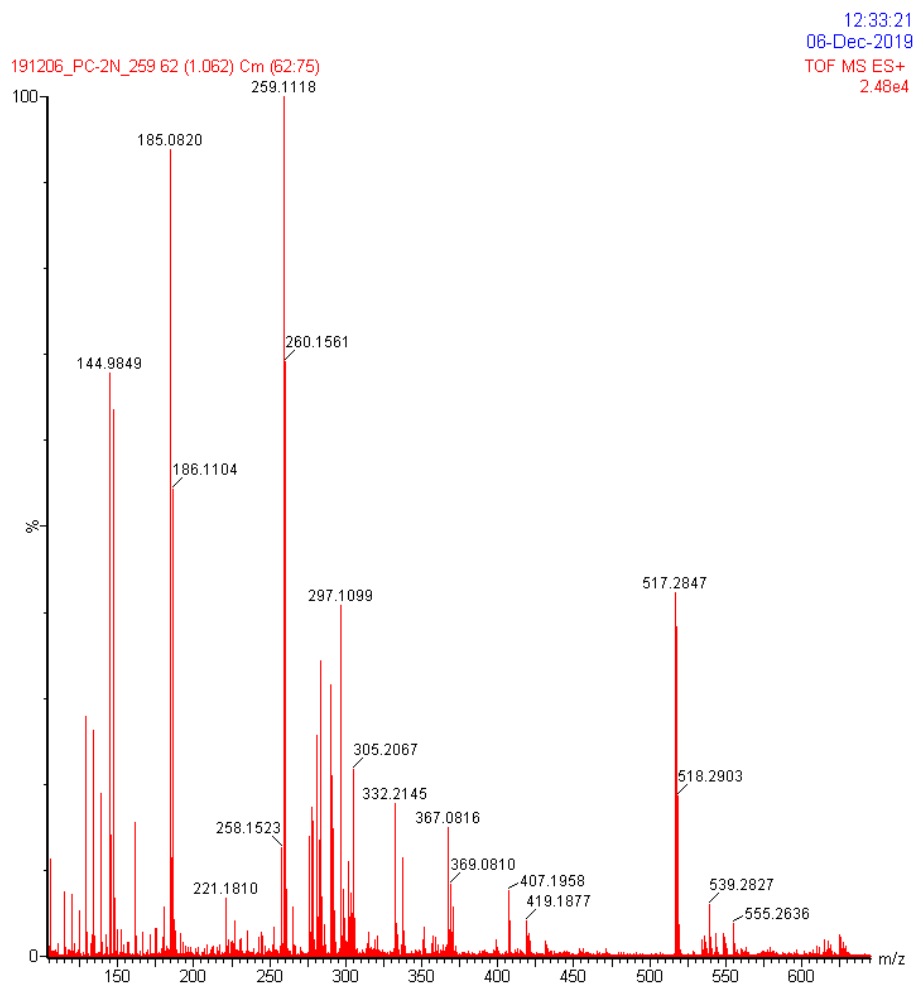

# FTMS spectrum of *rac*-**1b** (ESI-TOF)

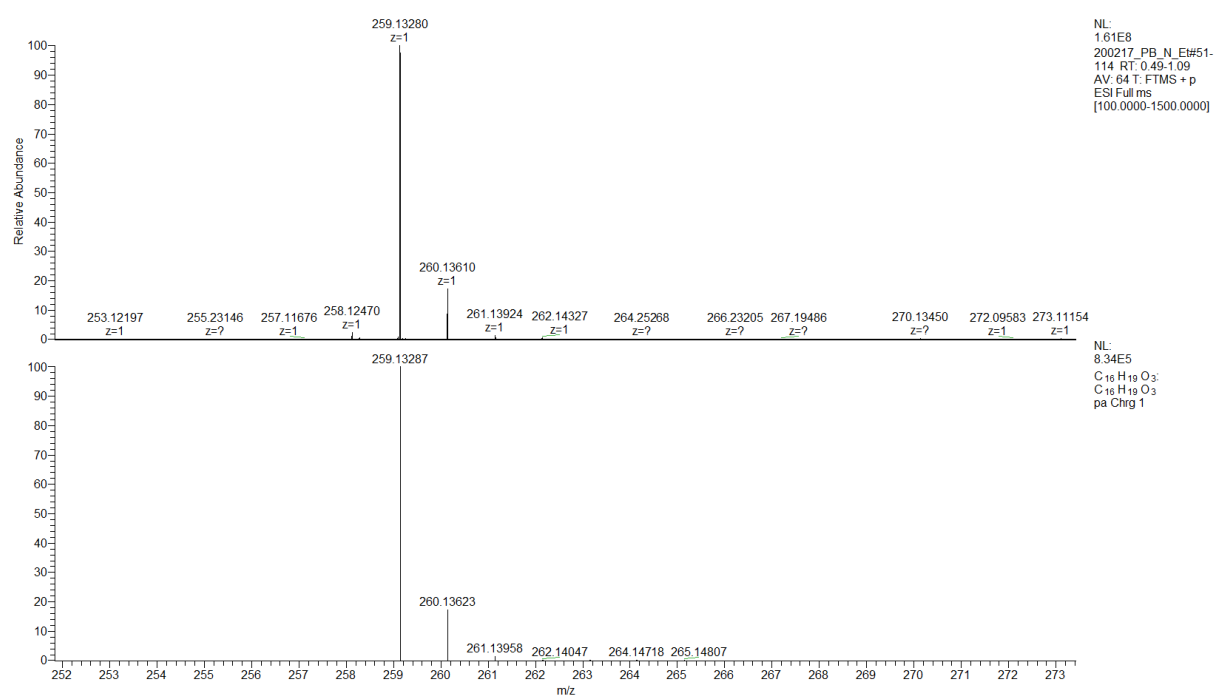

**Methyl 2-[4-(2-methylpropyl)phenyl]propanoate (Ibuprofen methyl ester, *rac*-2a)**

$^1\text{H}$  NMR spectrum of *rac*-2a (500 MHz,  $\text{CDCl}_3$ )

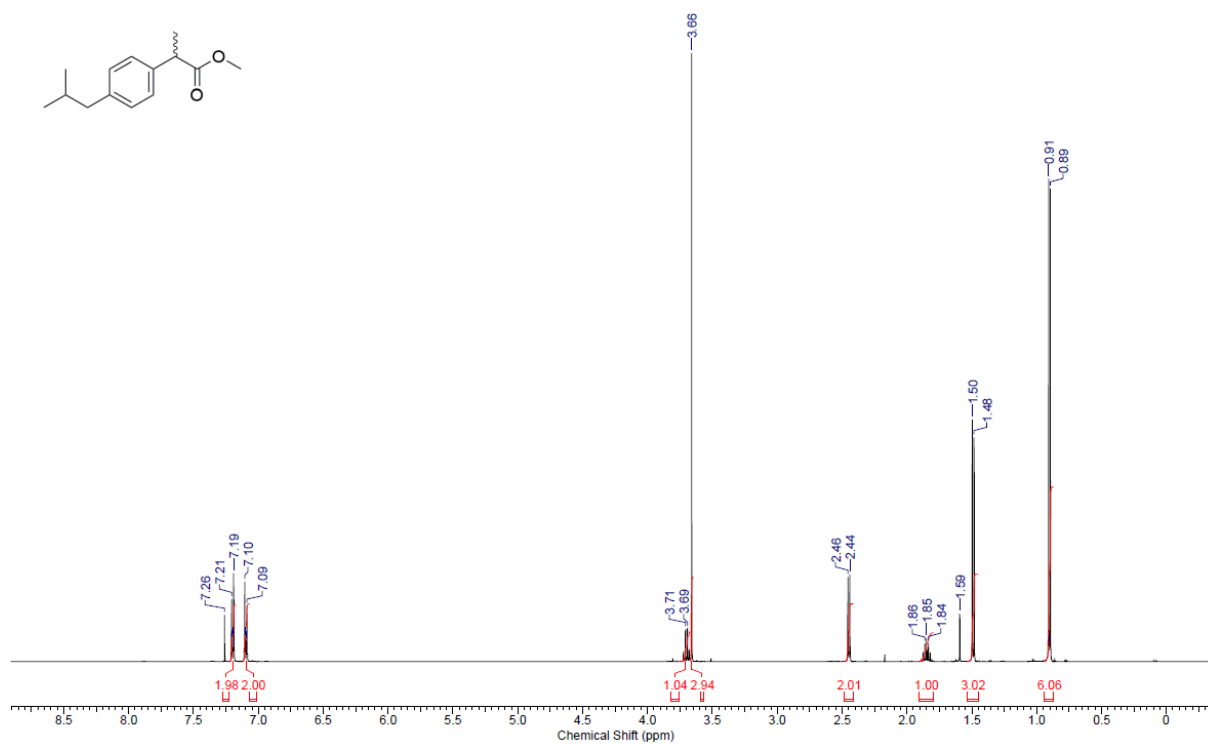

$^{13}\text{C}$  NMR spectrum of *rac*-2a (126 MHz,  $\text{CDCl}_3$ )

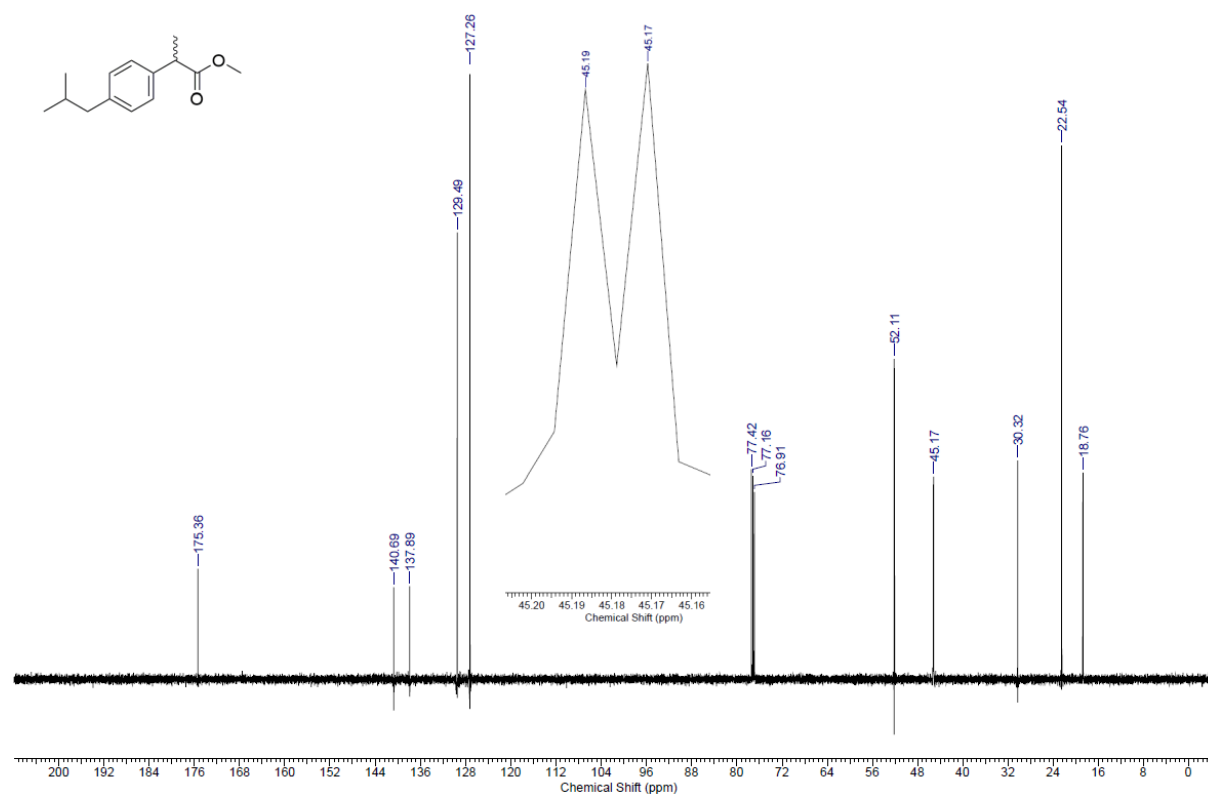

FTIR spectrum of *rac*-**2a** (Mineral oil, Nujol)

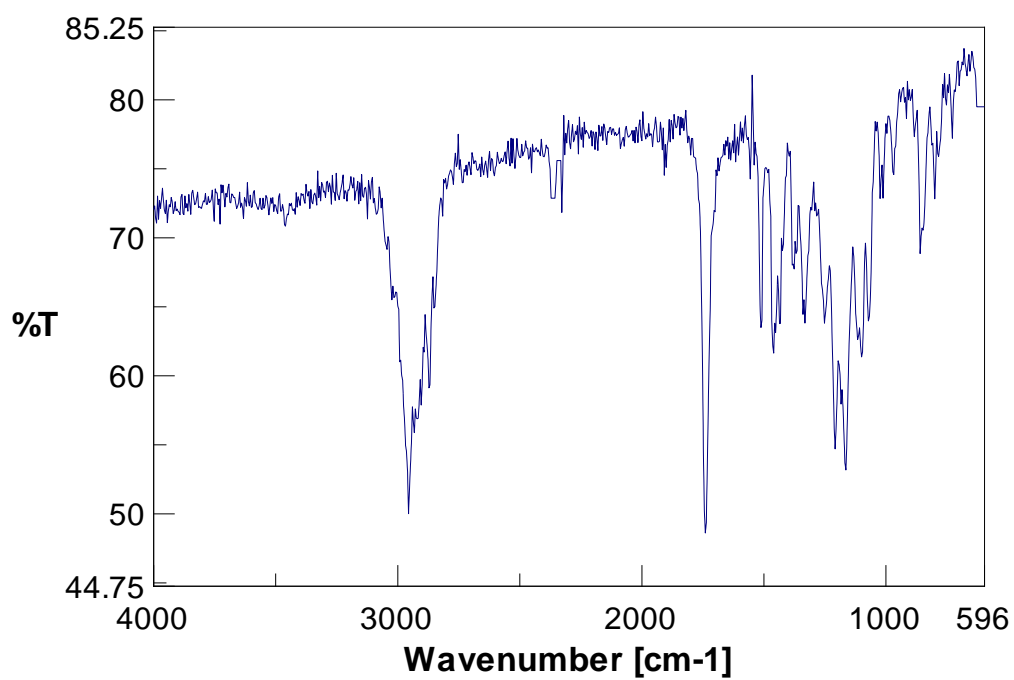

MS spectrum of *rac*-**2a** (ESI-TOF)

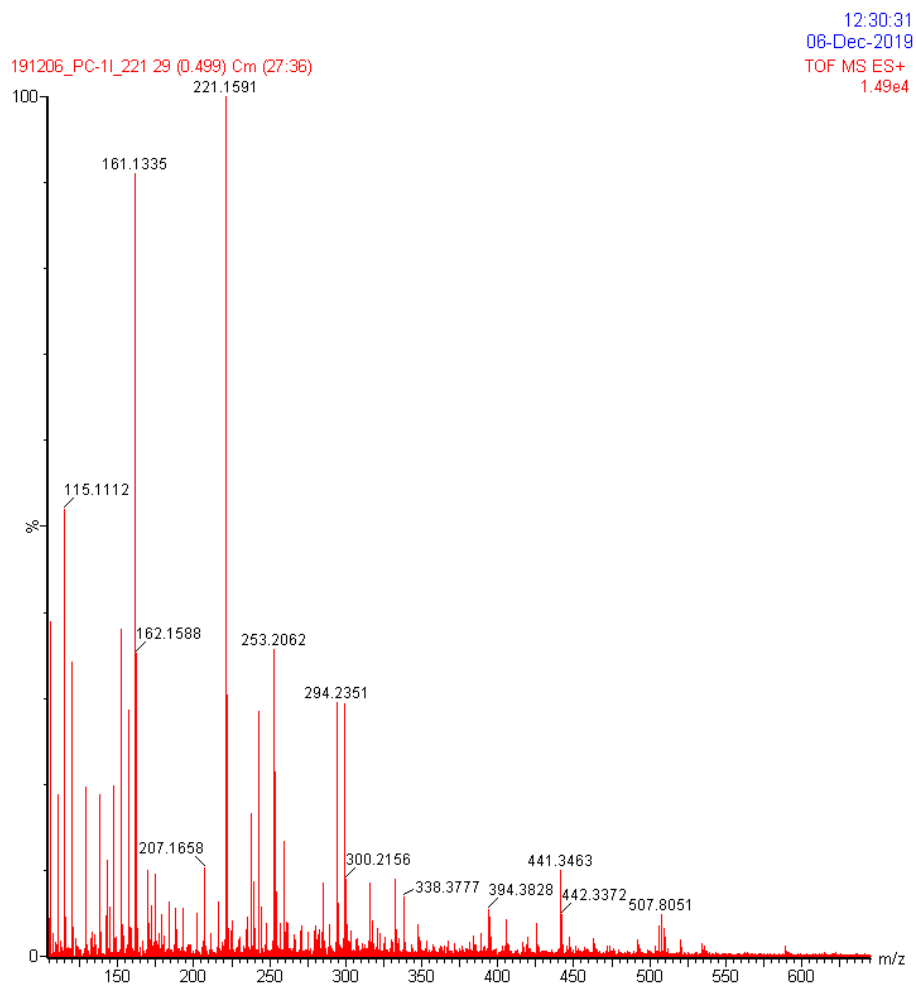

# FTMS spectrum of *rac*-**2a** (ESI-TOF)

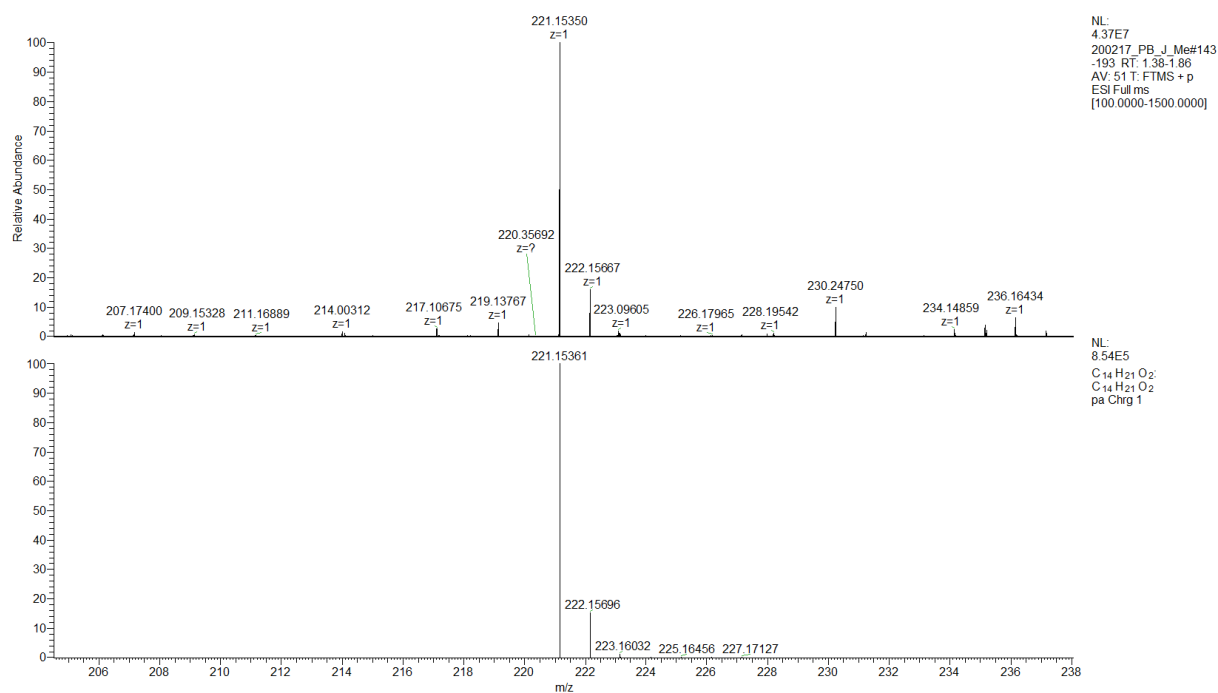





FTIR spectrum of *rac*-**2b** (Mineral oil, Nujol)

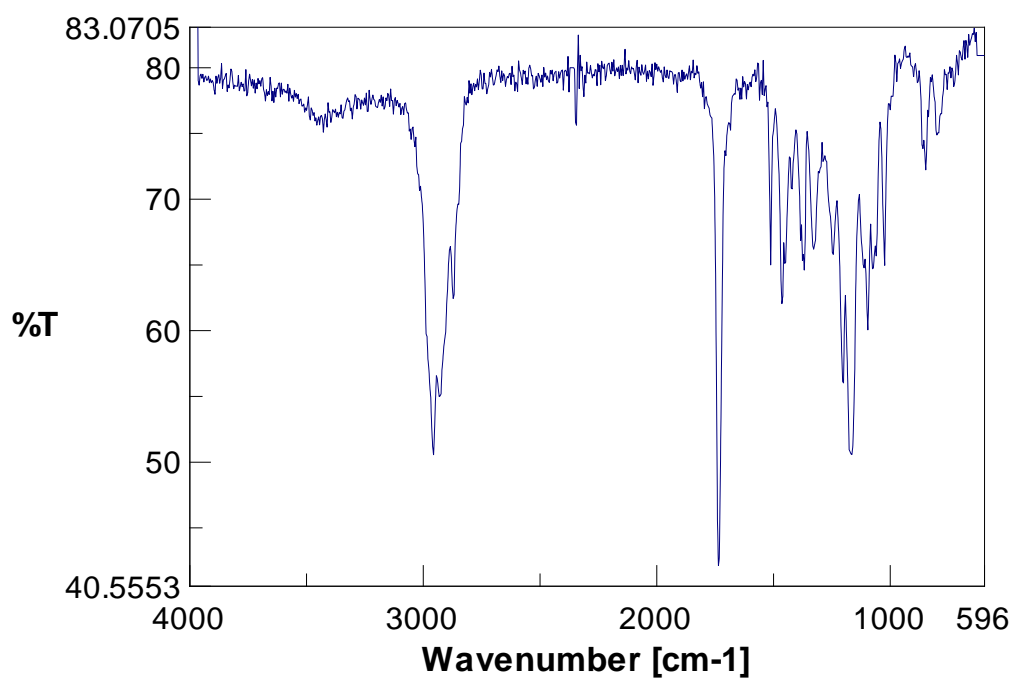

MS spectrum of *rac*-**2b** (ESI-TOF)

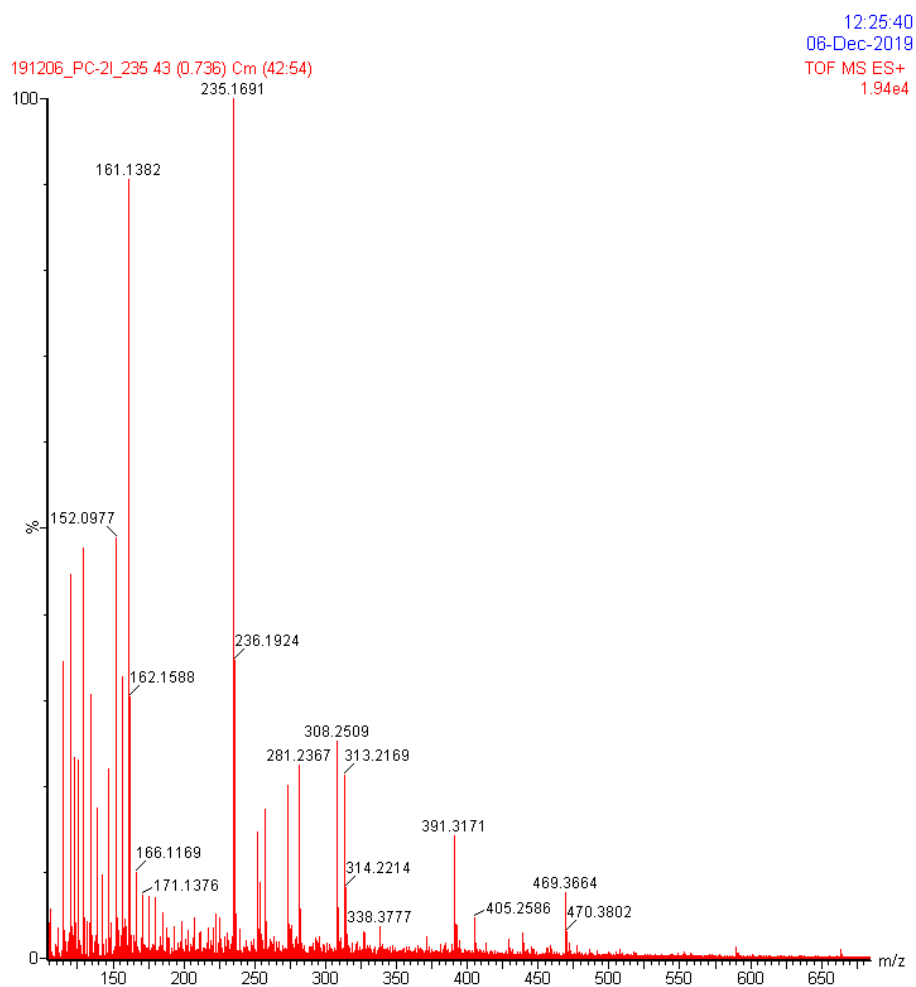

12:25:40  
08-Dec-2019  
TOF MS ES+  
1.94e4

# FTMS spectrum of *rac*-**2b** (ESI-TOF)

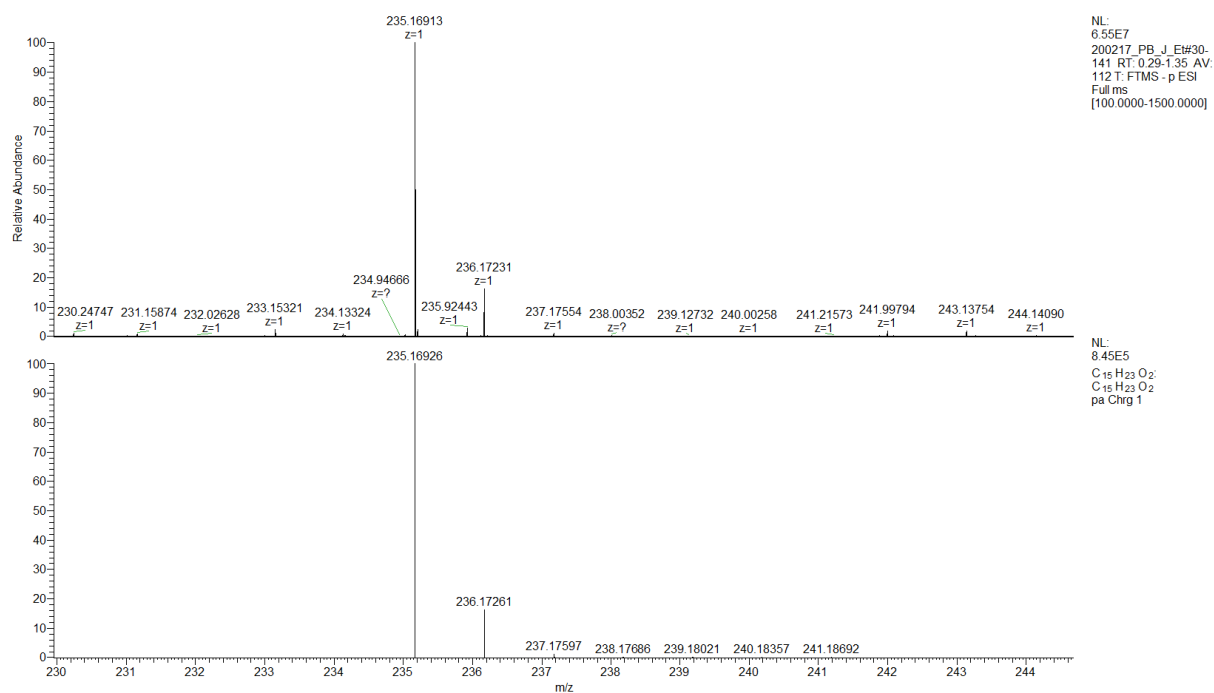

**Methyl 2-(3-benzoylphenyl)propanoate (Ketoprofen methyl ester, *rac*-3a)**

$^1\text{H}$  NMR spectrum of *rac*-3a (500 MHz,  $\text{CDCl}_3$ )

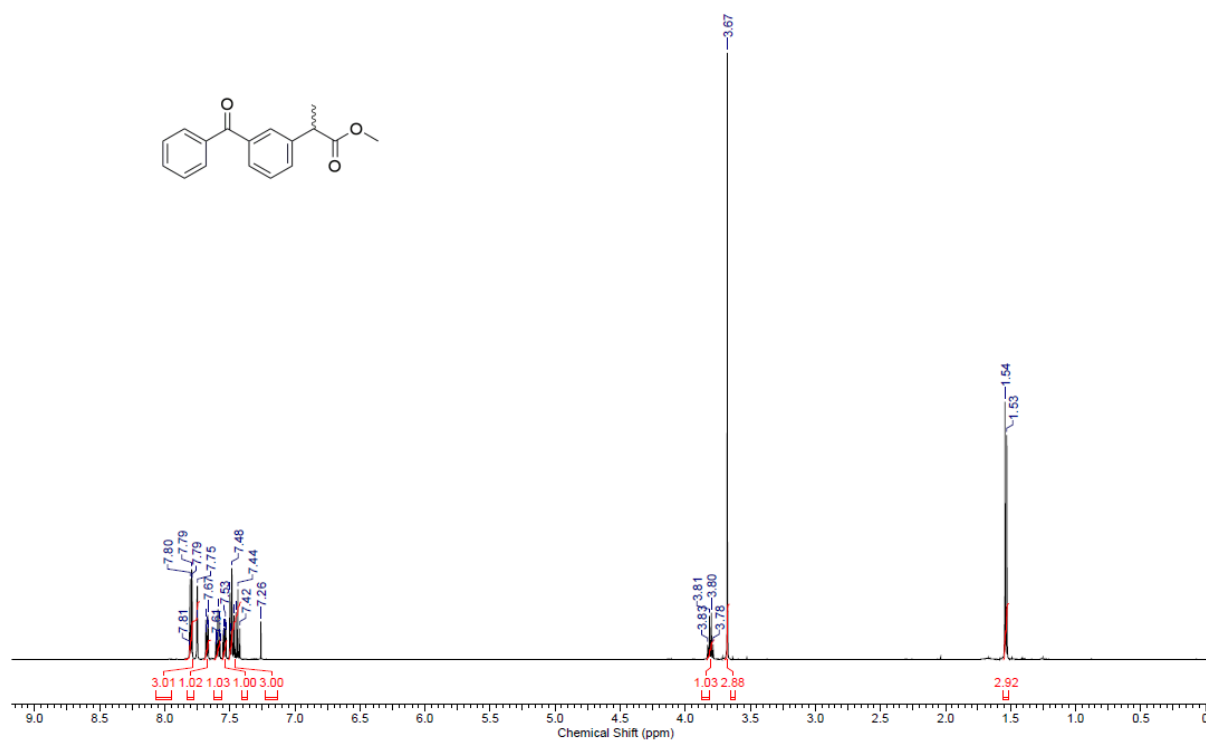

$^{13}\text{C}$  NMR spectrum of *rac*-3a (126 MHz,  $\text{CDCl}_3$ )

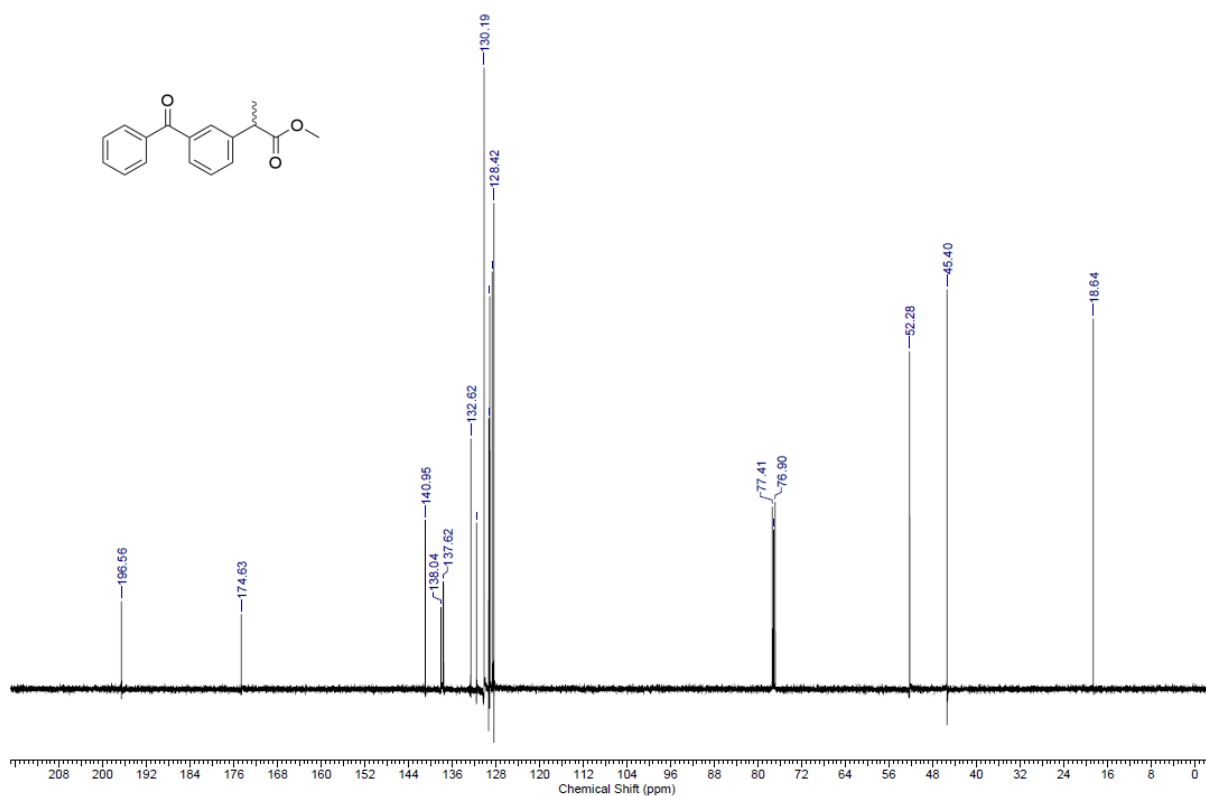

FTIR spectrum of *rac*-**3a** (Mineral oil, Nujol)

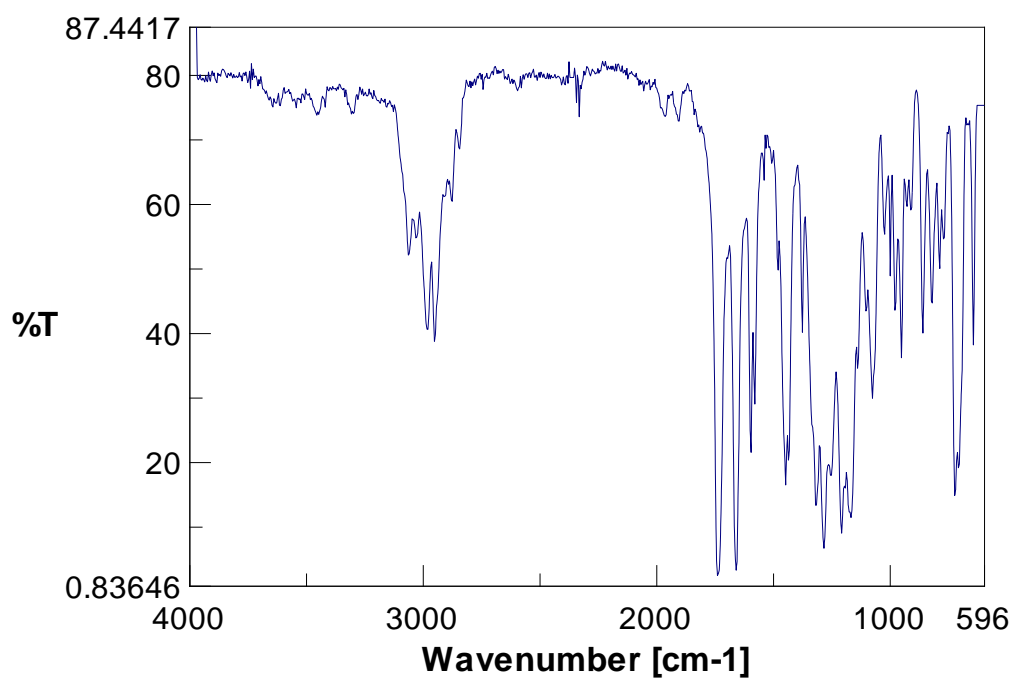

MS spectrum of *rac*-**3a** (ESI-TOF)

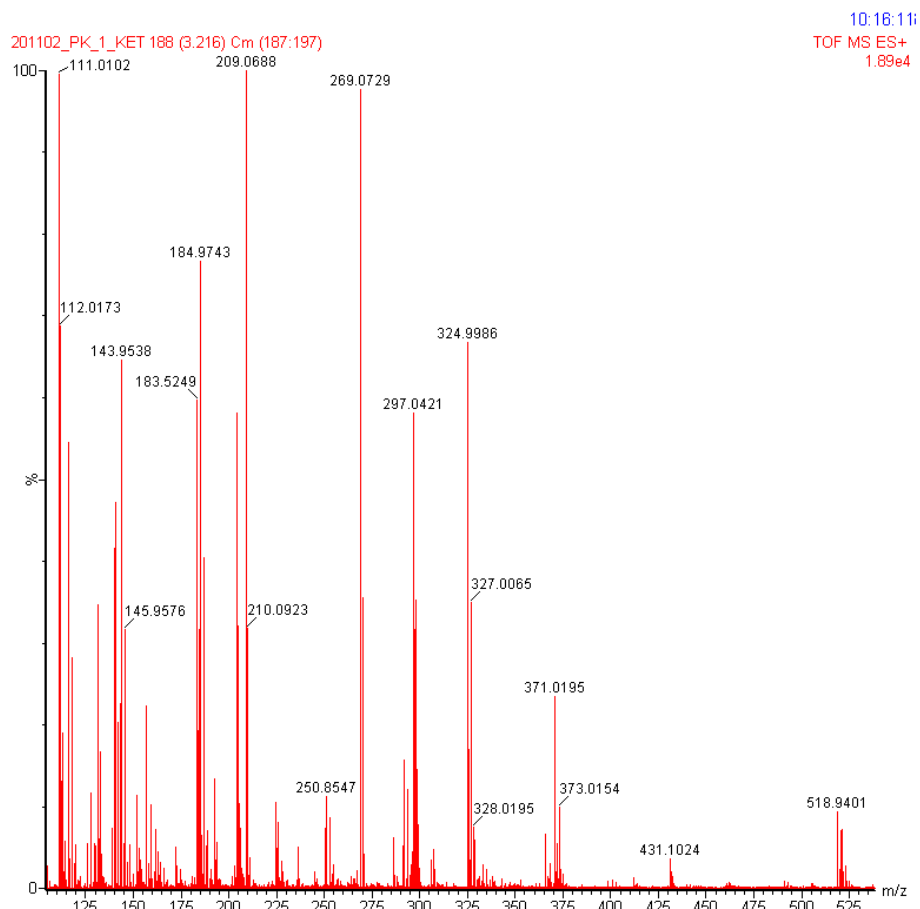

# FTMS spectrum of *rac*-**3a** (ESI-TOF)

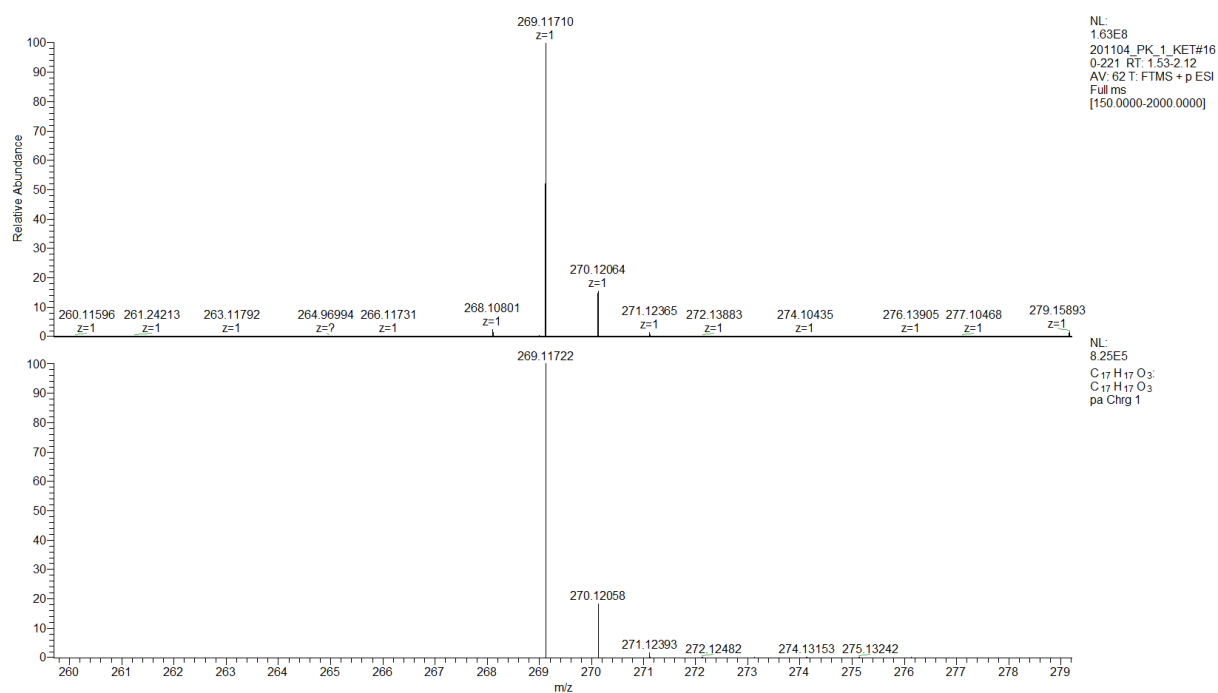

***Ethyl 2-(3-benzoylphenyl)propanoate (Ketoprofen ethyl ester, rac-3b)***

$^1\text{H}$  NMR spectrum of *rac*-**3b** (500 MHz,  $\text{CDCl}_3$ )

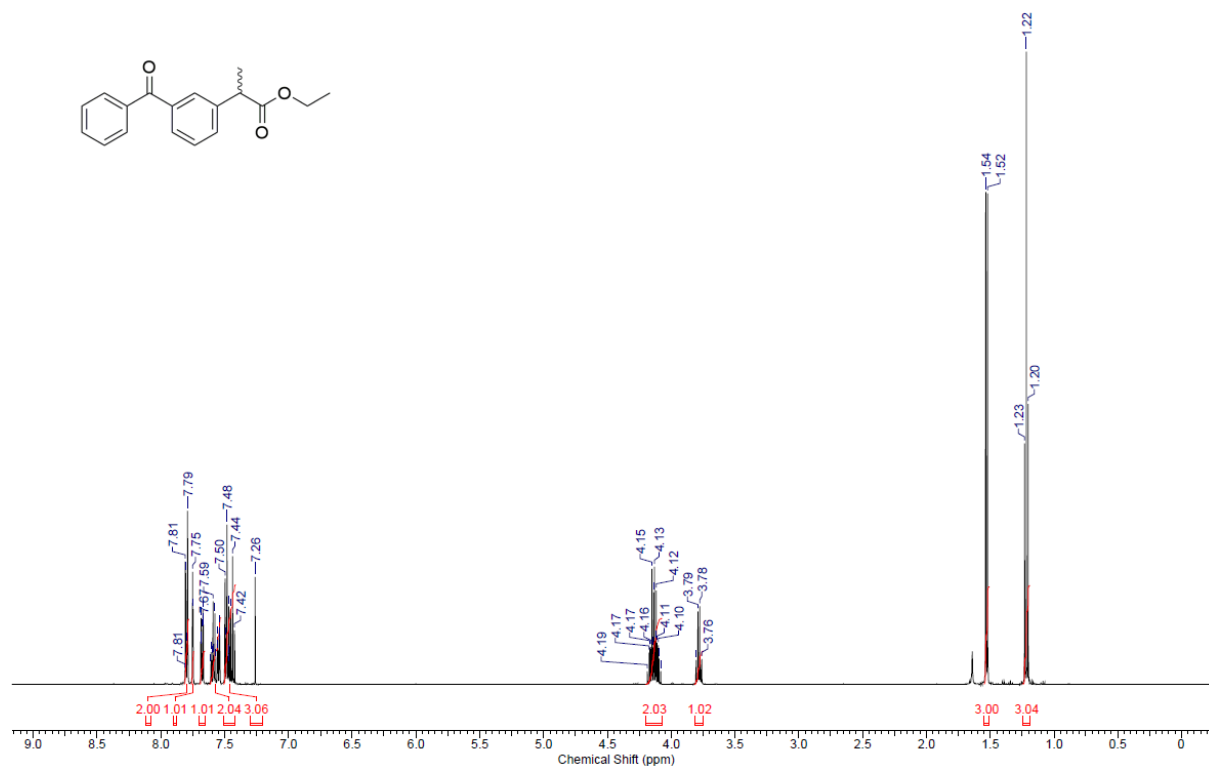

$^{13}\text{C}$  NMR spectrum of *rac*-**3b** (126 MHz,  $\text{CDCl}_3$ )

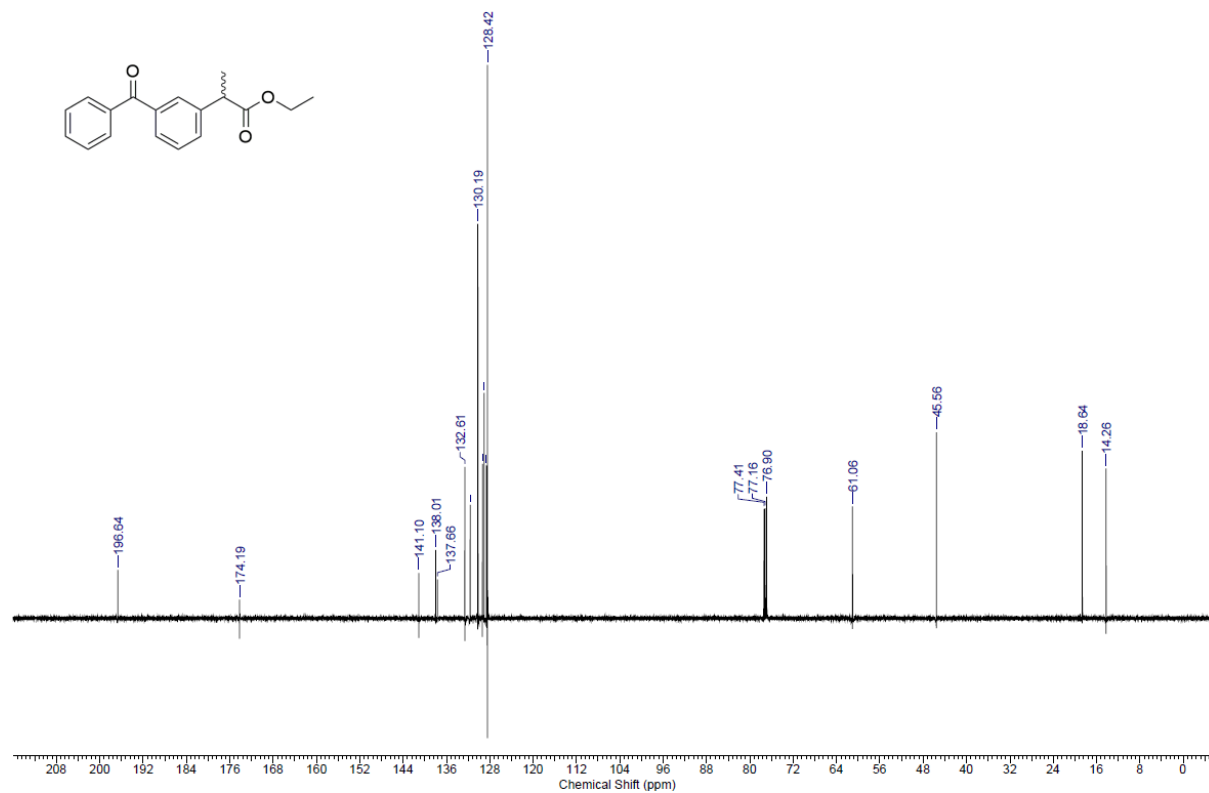

FTIR spectrum of *rac*-**3b** (Mineral oil, Nujol)

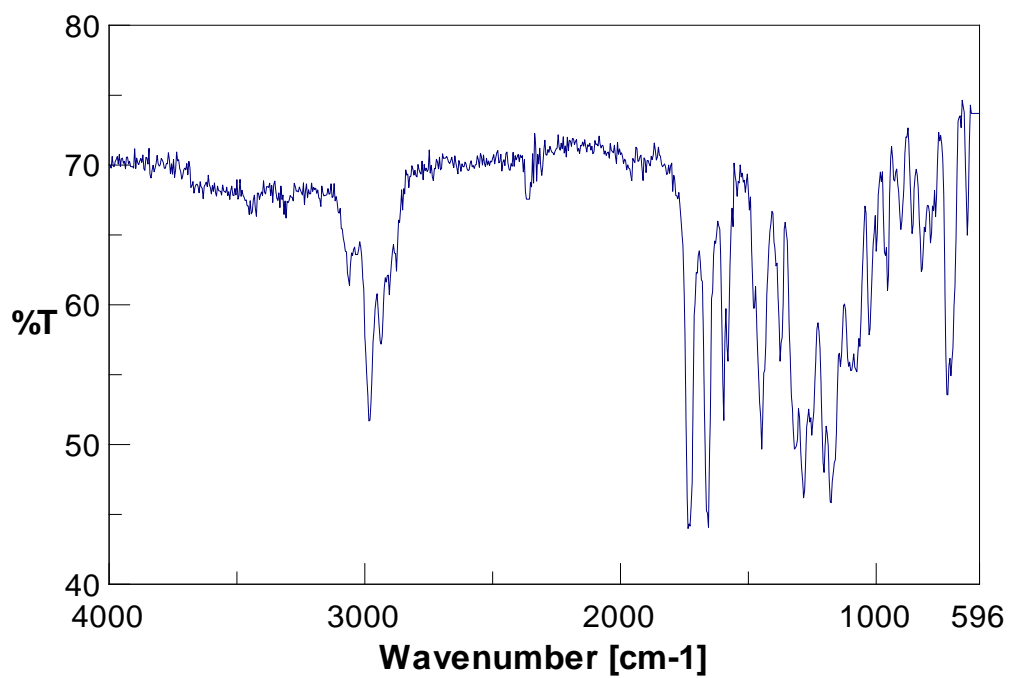

MS spectrum of *rac*-**3b** (ESI-TOF)

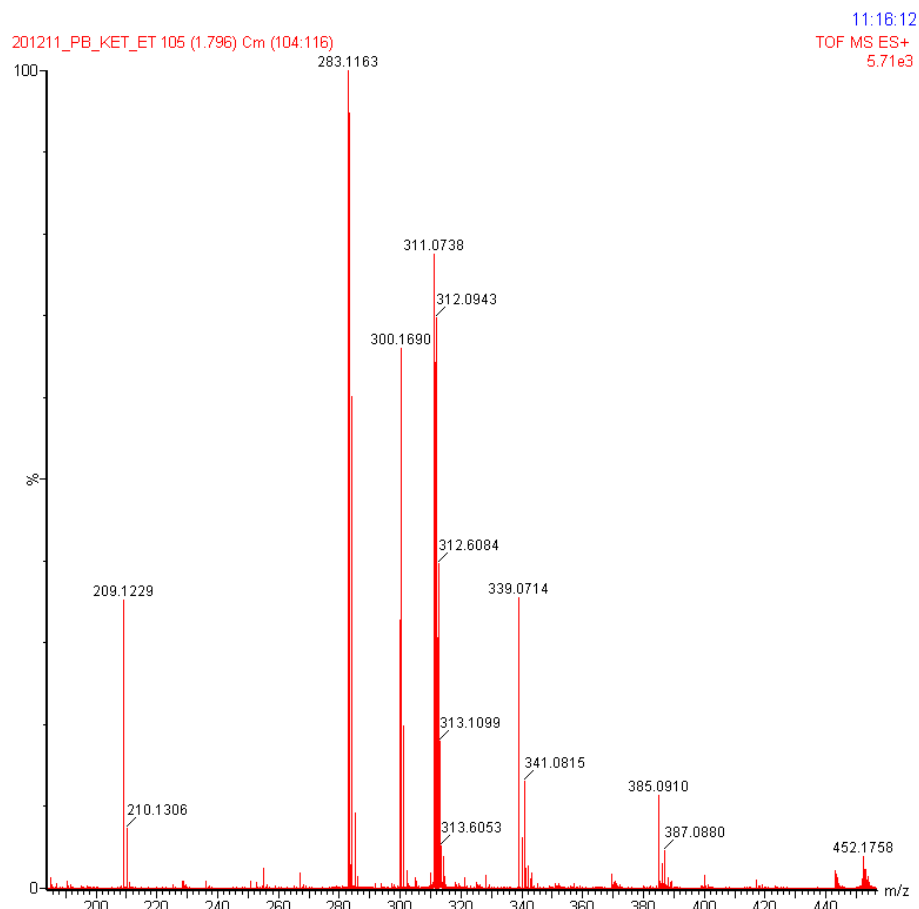

# FTMS spectrum of *rac*-**3b** (ESI-TOF)

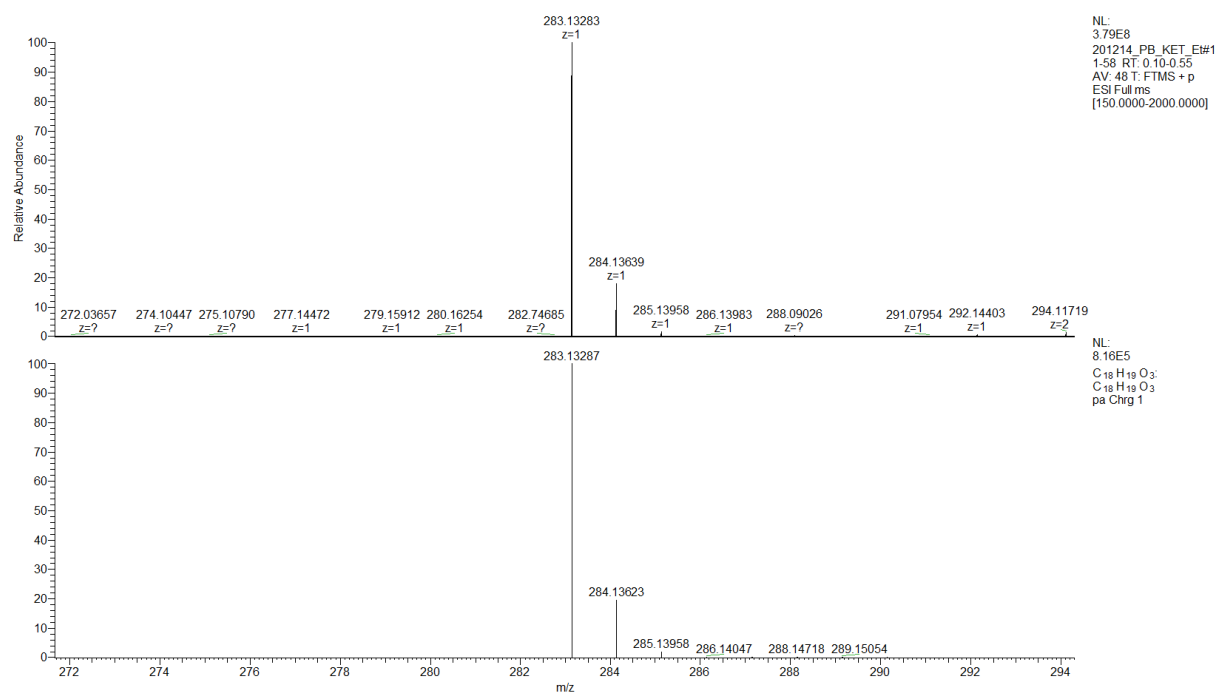



**Methyl 2-(2-fluoro[1,1'-biphenyl]-4-yl)propanoate (Flurbiprofen methyl ester, *rac*-4a)**

$^1\text{H}$  NMR spectrum of *rac*-4a (500 MHz,  $\text{CDCl}_3$ )

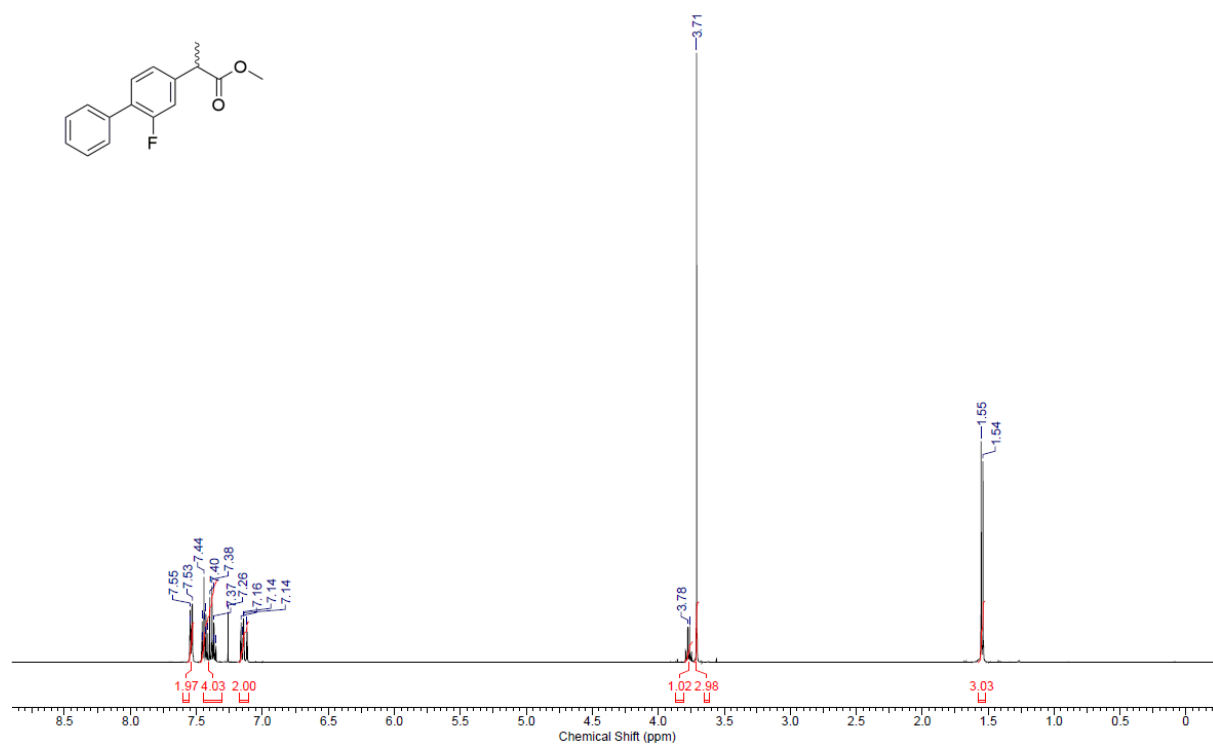

$^{13}\text{C}$  NMR spectrum of *rac*-4a (126 MHz,  $\text{CDCl}_3$ )

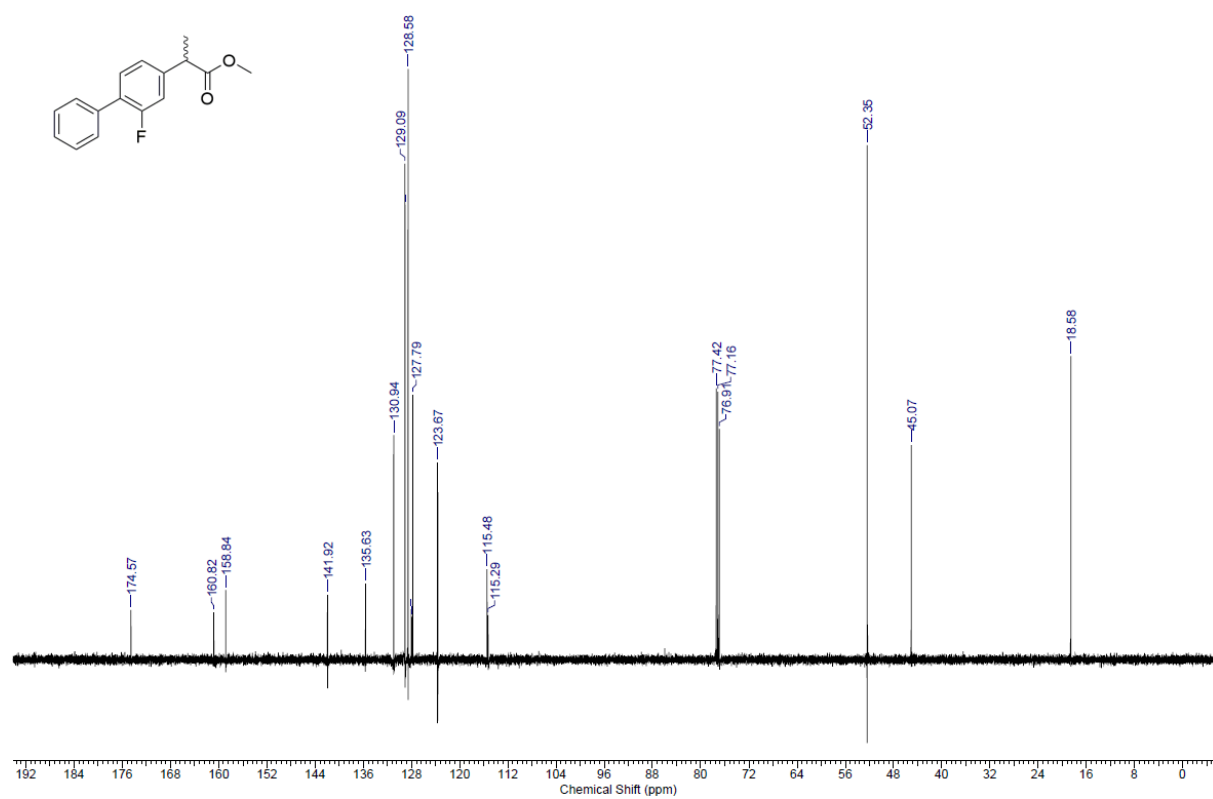

$^{19}\text{F}$  NMR spectrum of *rac*-**4a** (470 MHz,  $\text{CDCl}_3$ )

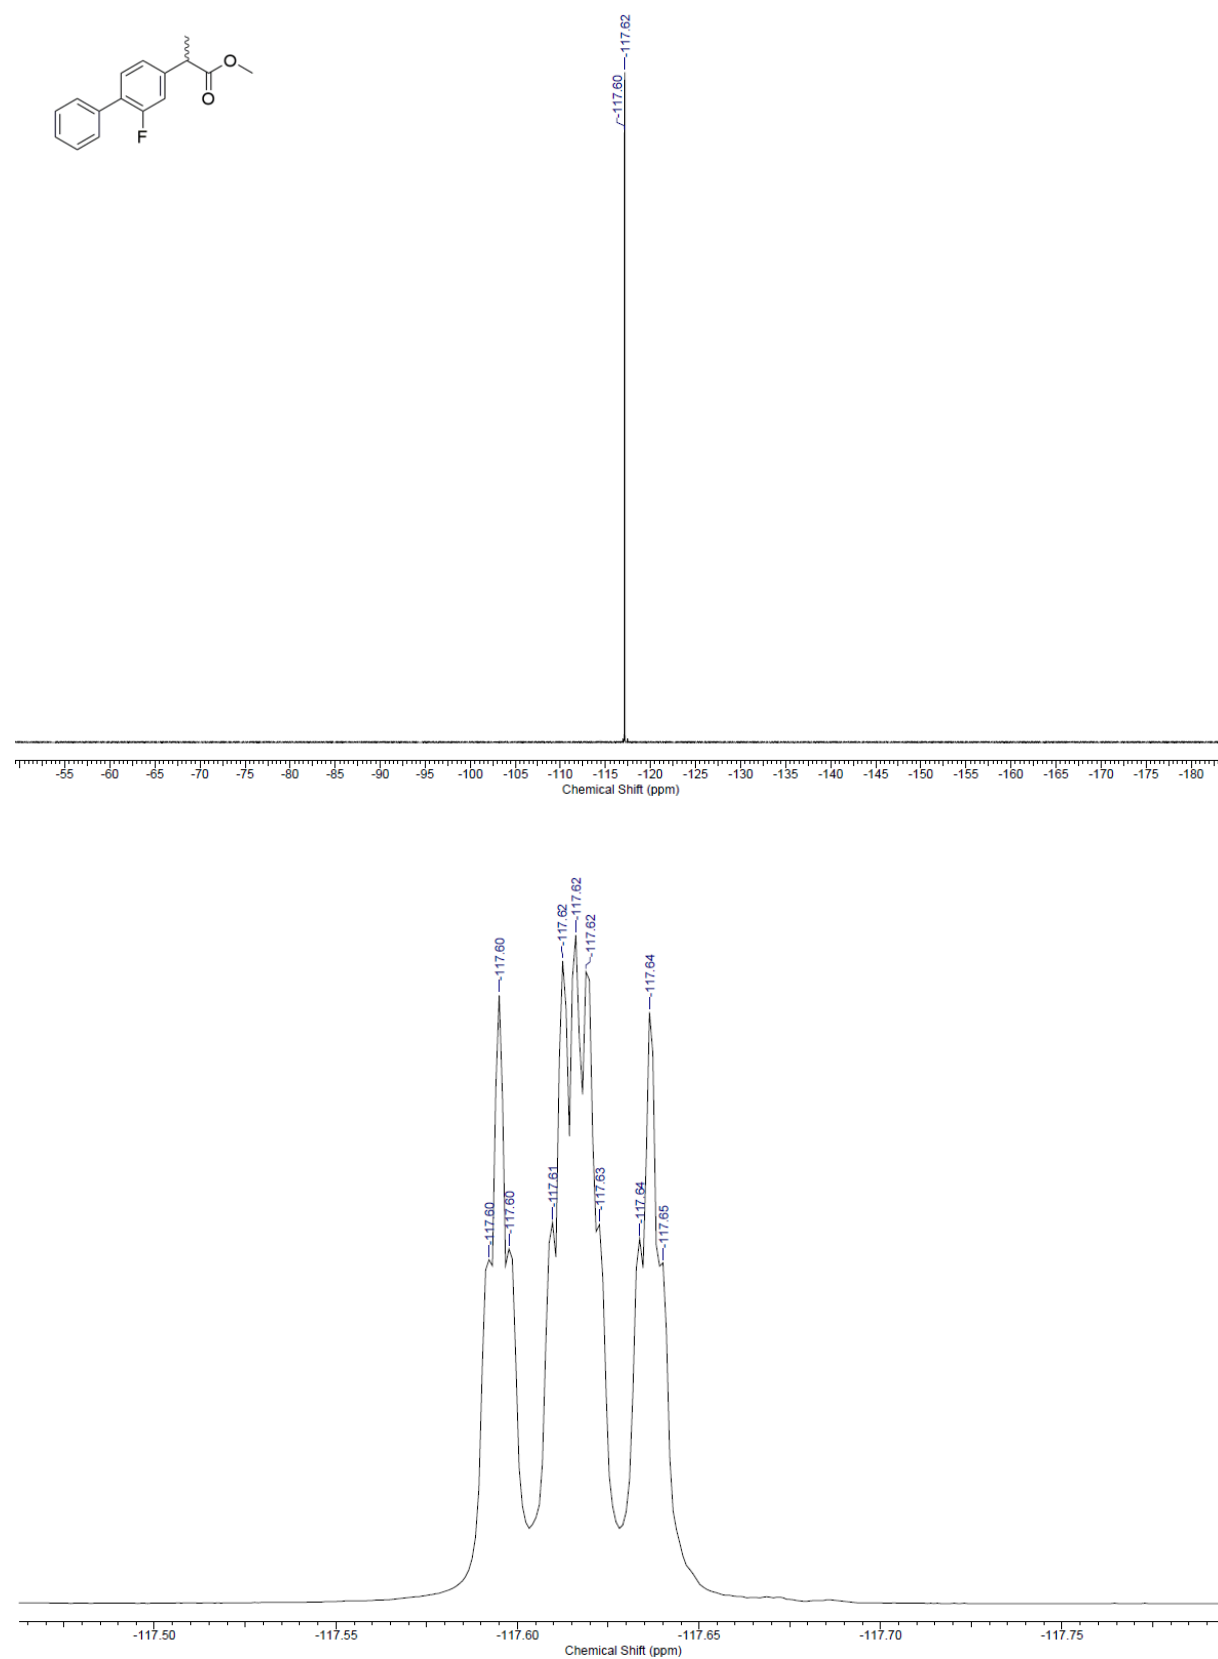

FTIR spectrum of *rac*-**4a** (Mineral oil, Nujol)

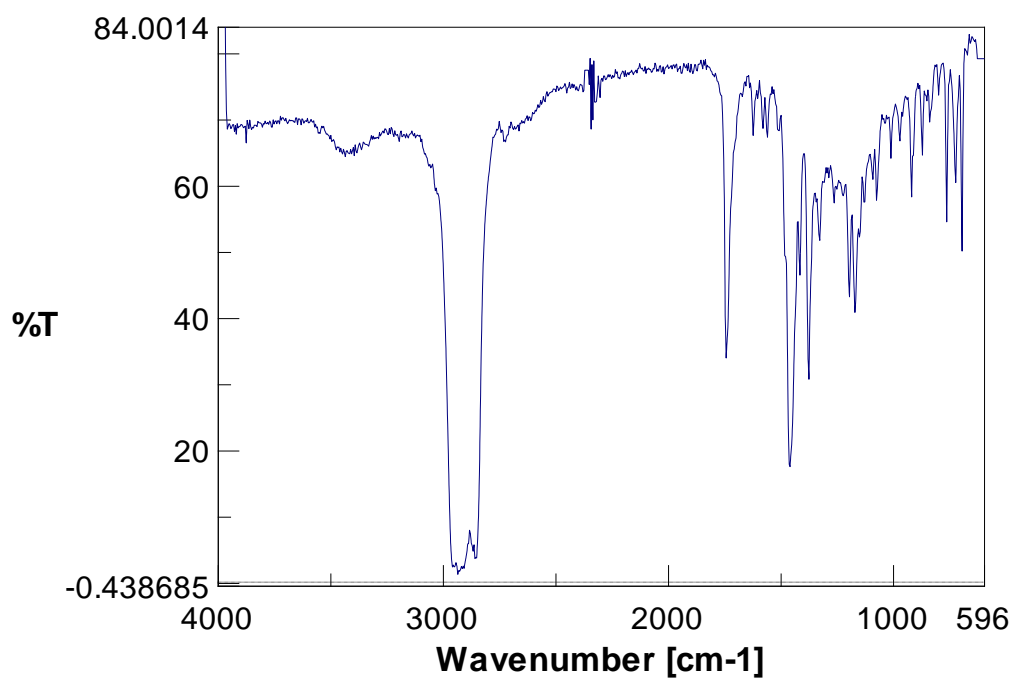

MS spectrum of *rac*-**4a** (ESI-TOF)

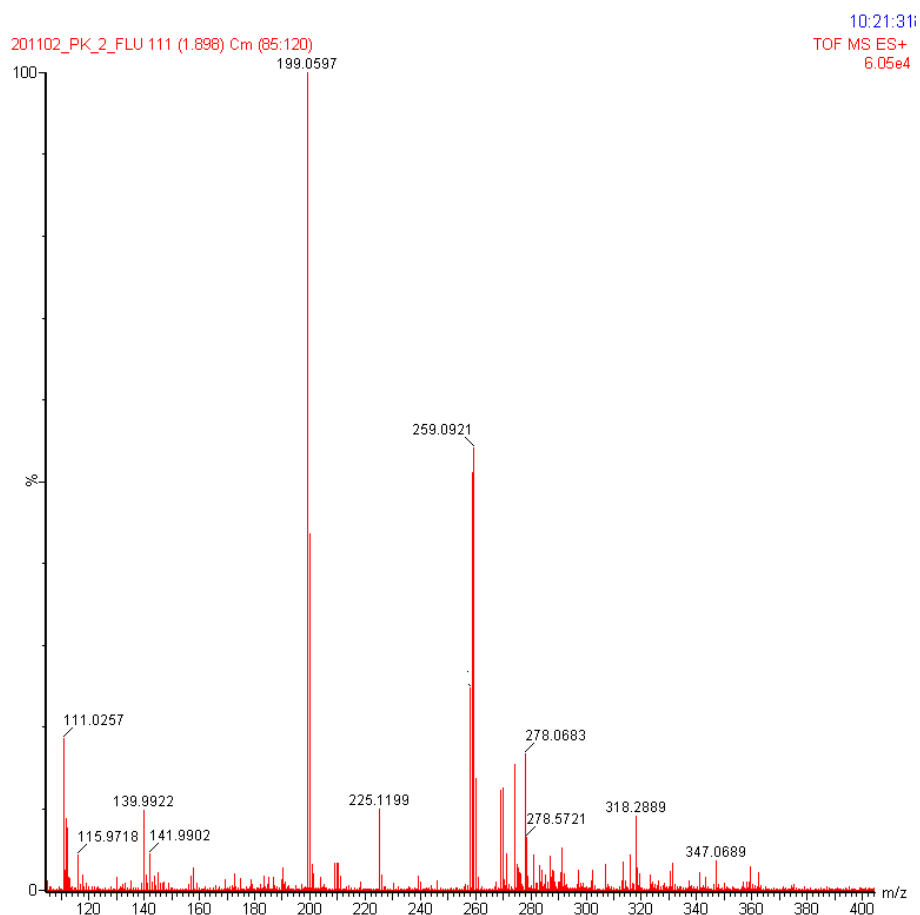

# FTMS spectrum of *rac*-**4a** (ESI-TOF)

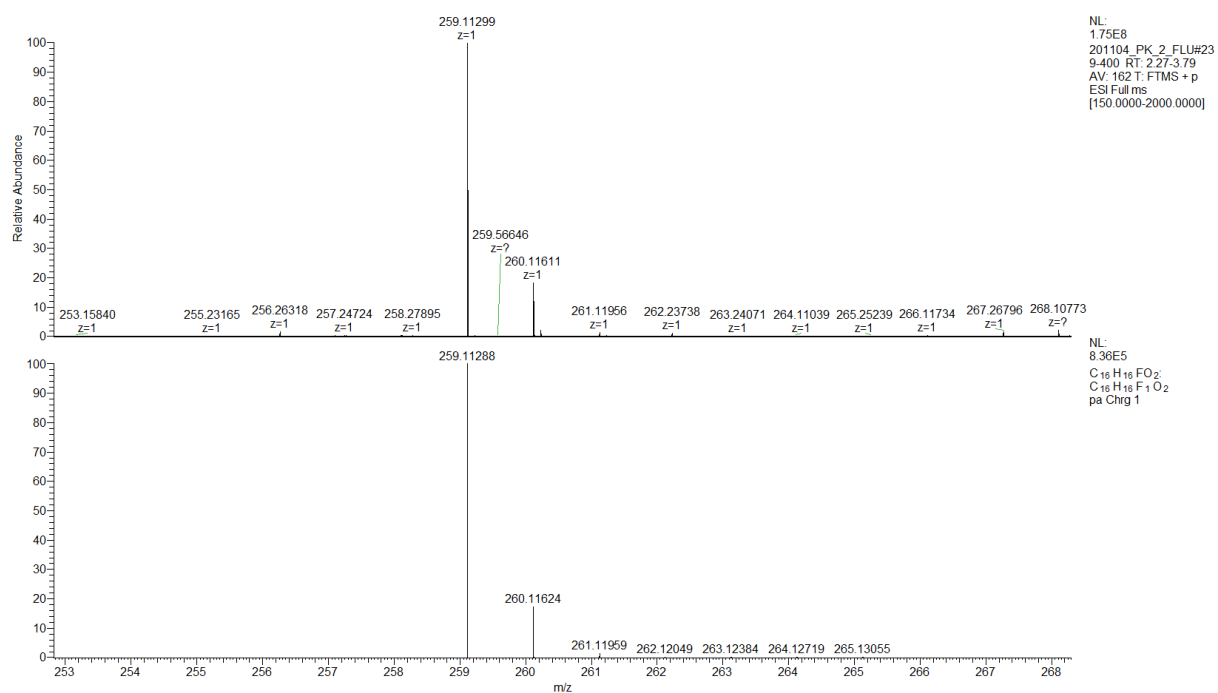

***Ethyl 2-(2-fluoro[1,1'-biphenyl]-4-yl)propanoate (Flurbiprofen ethyl ester, rac-4b)***

$^1\text{H}$  NMR spectrum of *rac*-**4b** (500 MHz,  $\text{CDCl}_3$ )

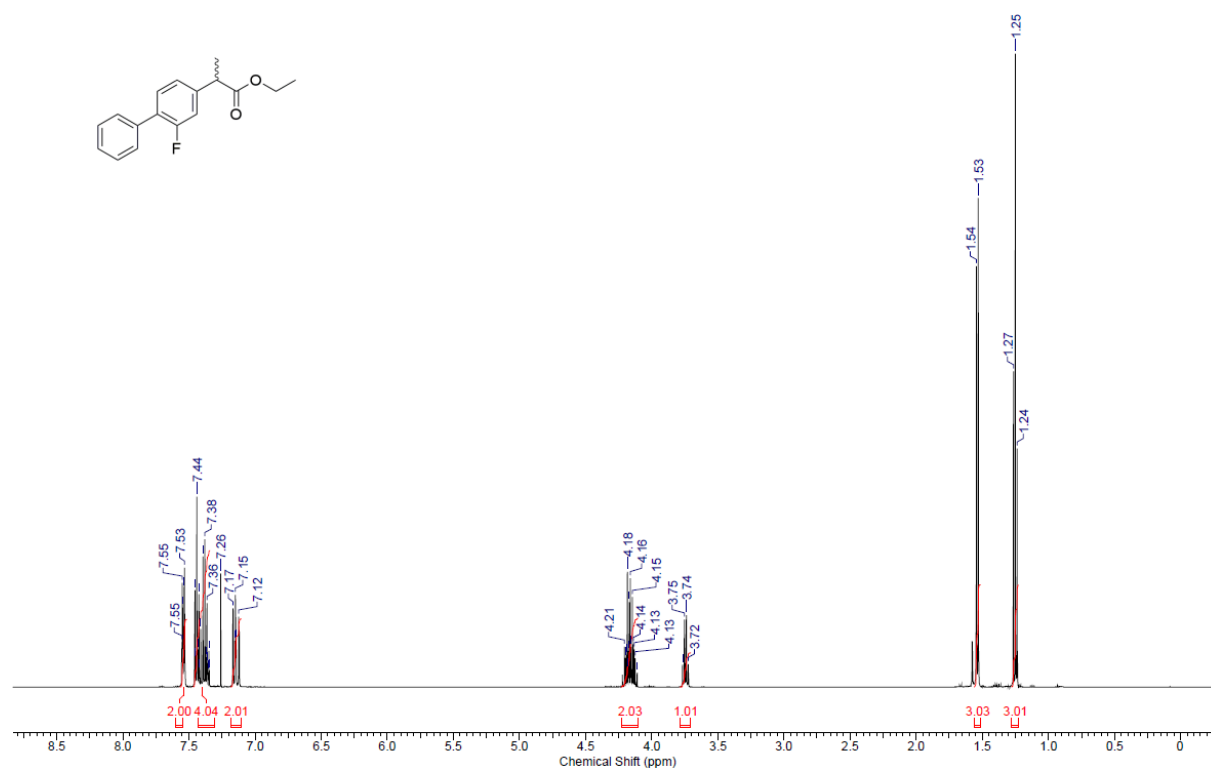

$^{13}\text{C}$  NMR spectrum of *rac*-**4b** (126 MHz,  $\text{CDCl}_3$ )

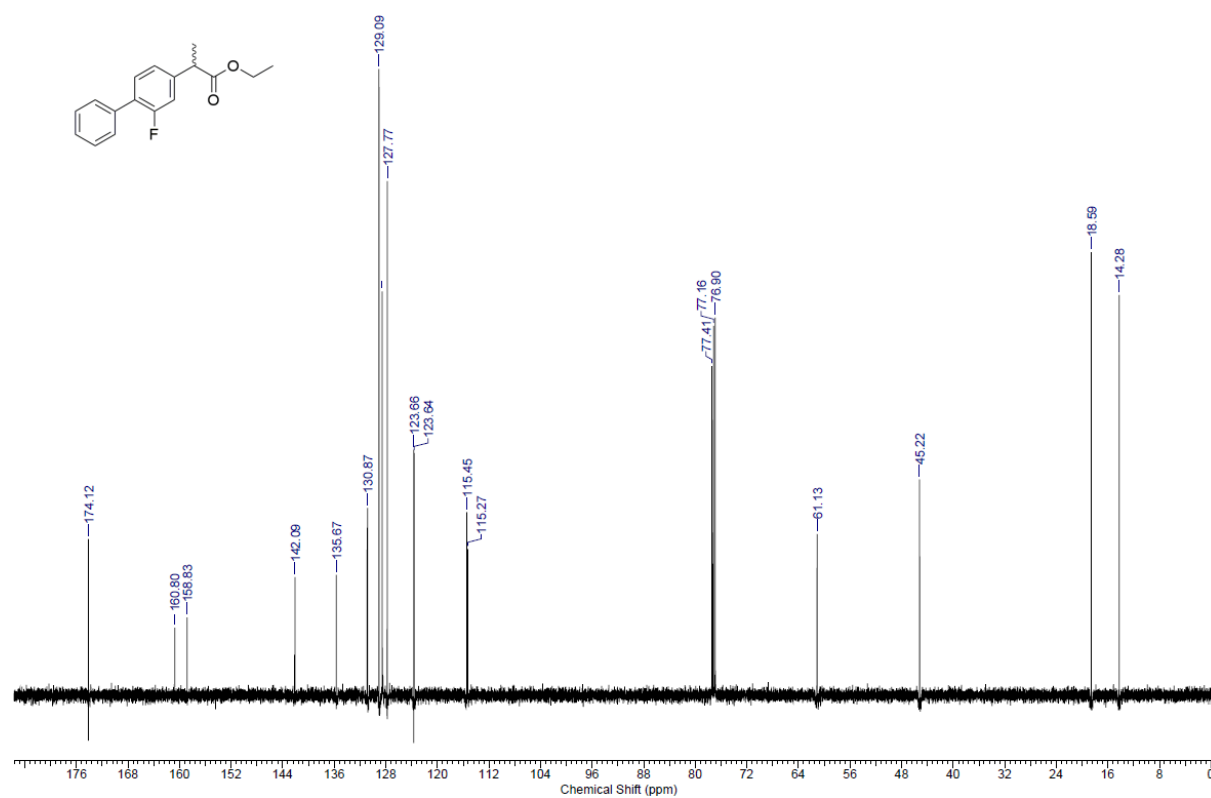

$^{19}\text{F}$  NMR spectrum of *rac*-**4b** (470 MHz,  $\text{CDCl}_3$ )

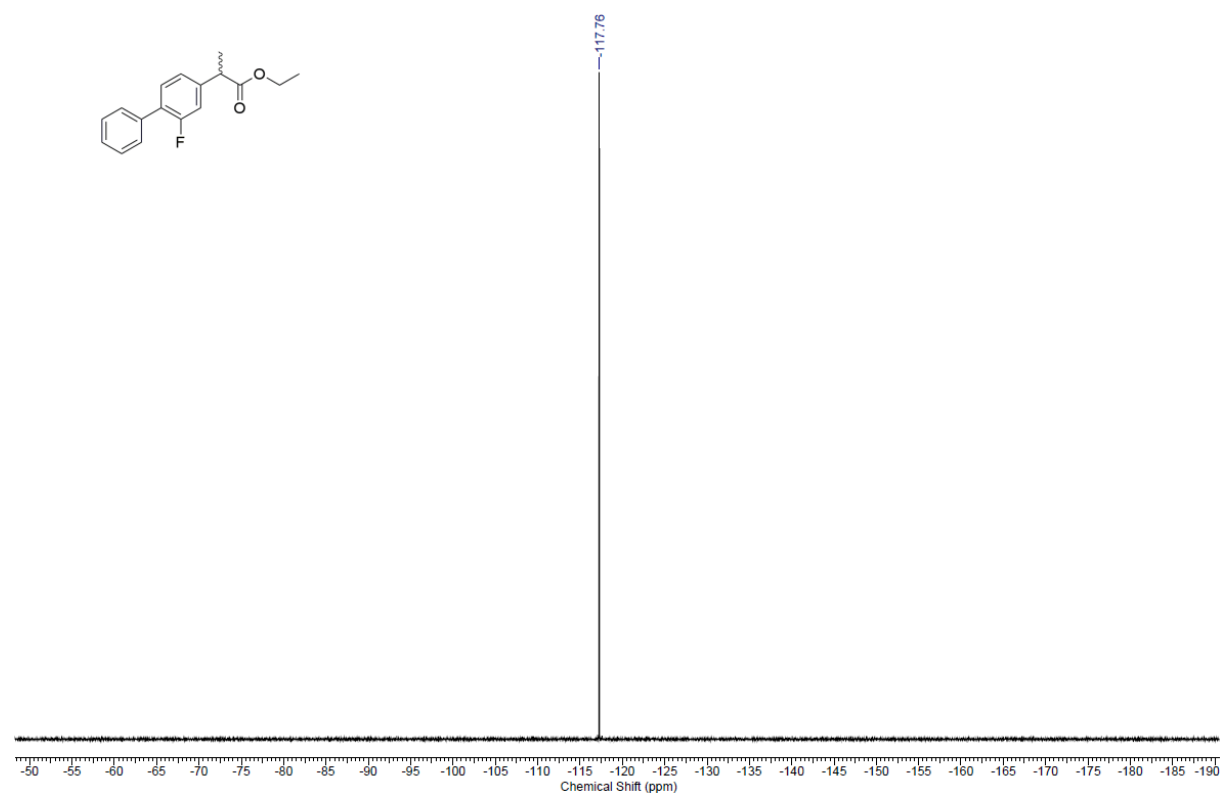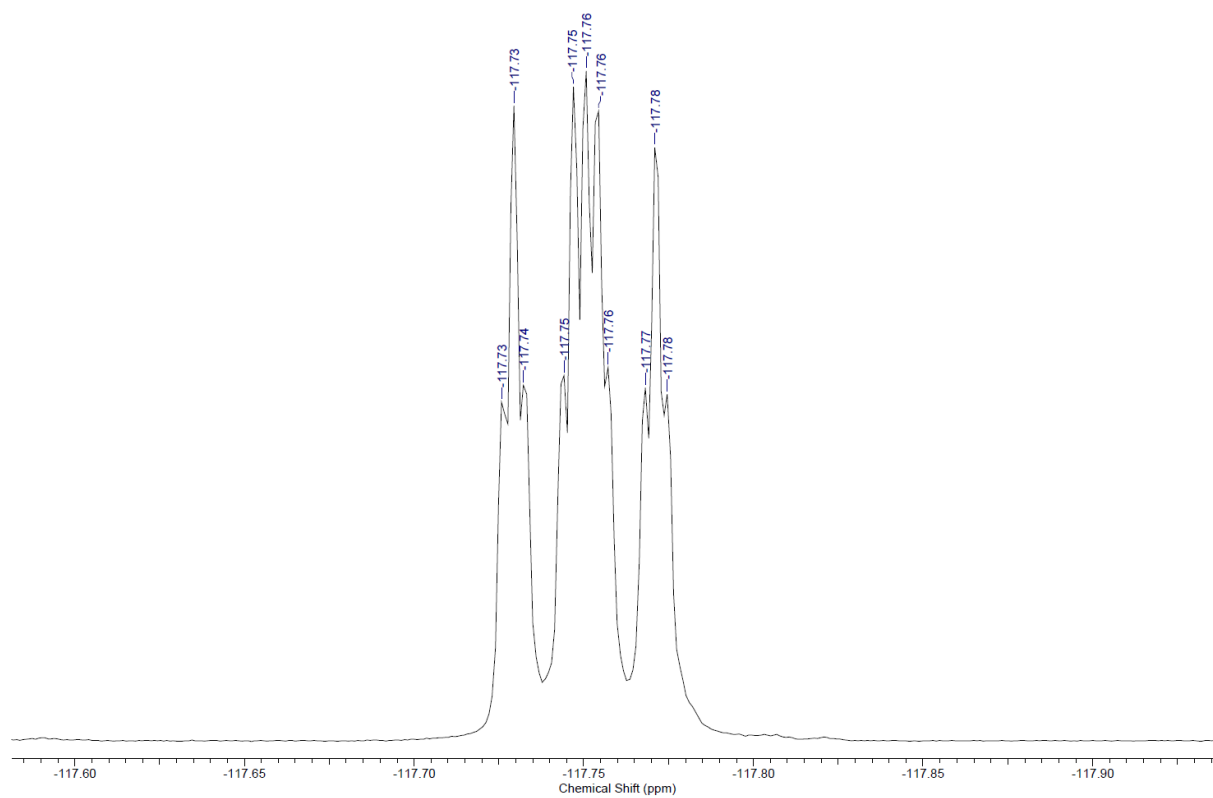

FTIR spectrum of *rac*-**4b** (Mineral oil, Nujol)

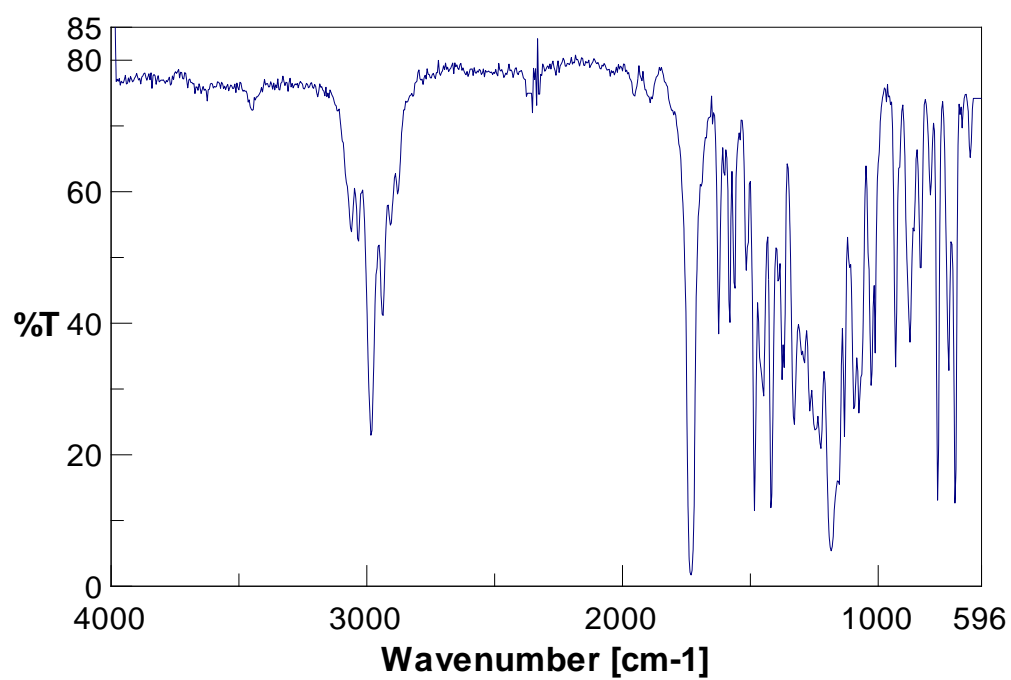

MS spectrum of *rac*-**4b** (ESI-TOF)

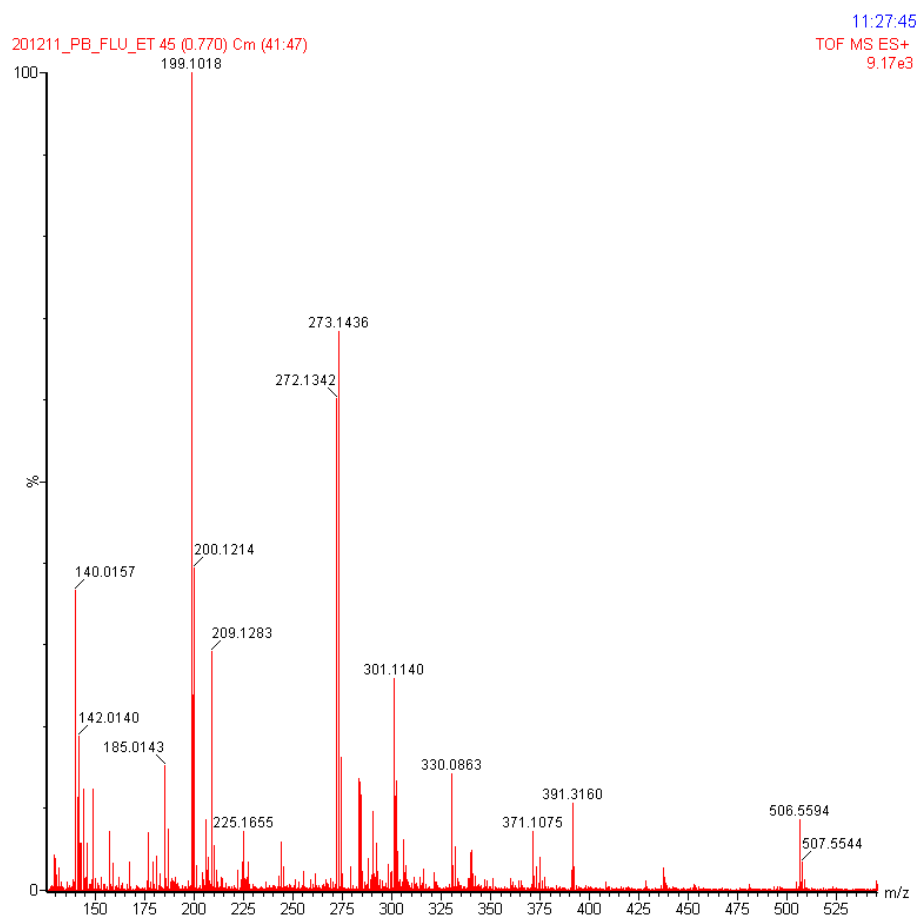

# FTMS spectrum of *rac*-**4b** (ESI-TOF)

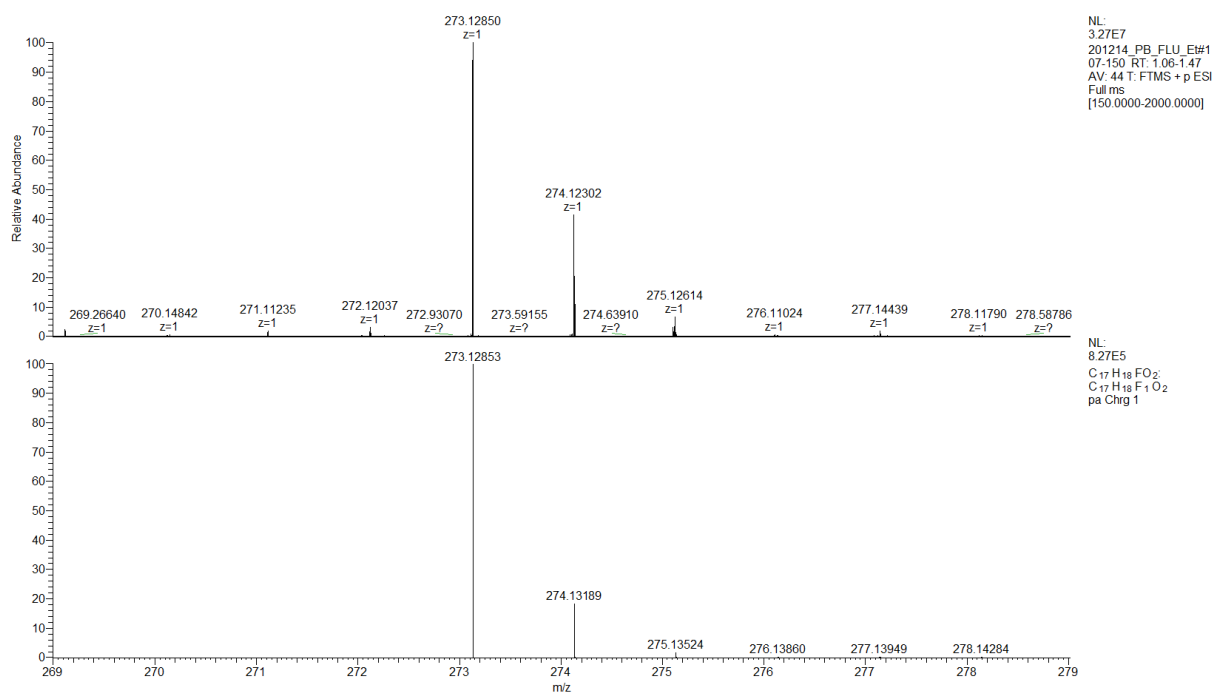



**Methyl (1,8-diethyl-1,3,4,9-tetrahydropyrano[3,4-b]indol-1-yl)acetate (Etodolac methyl ester, *rac*-5a)**

<sup>1</sup>H NMR spectrum of *rac*-5a (500 MHz, DMSO-*d*<sub>6</sub>)

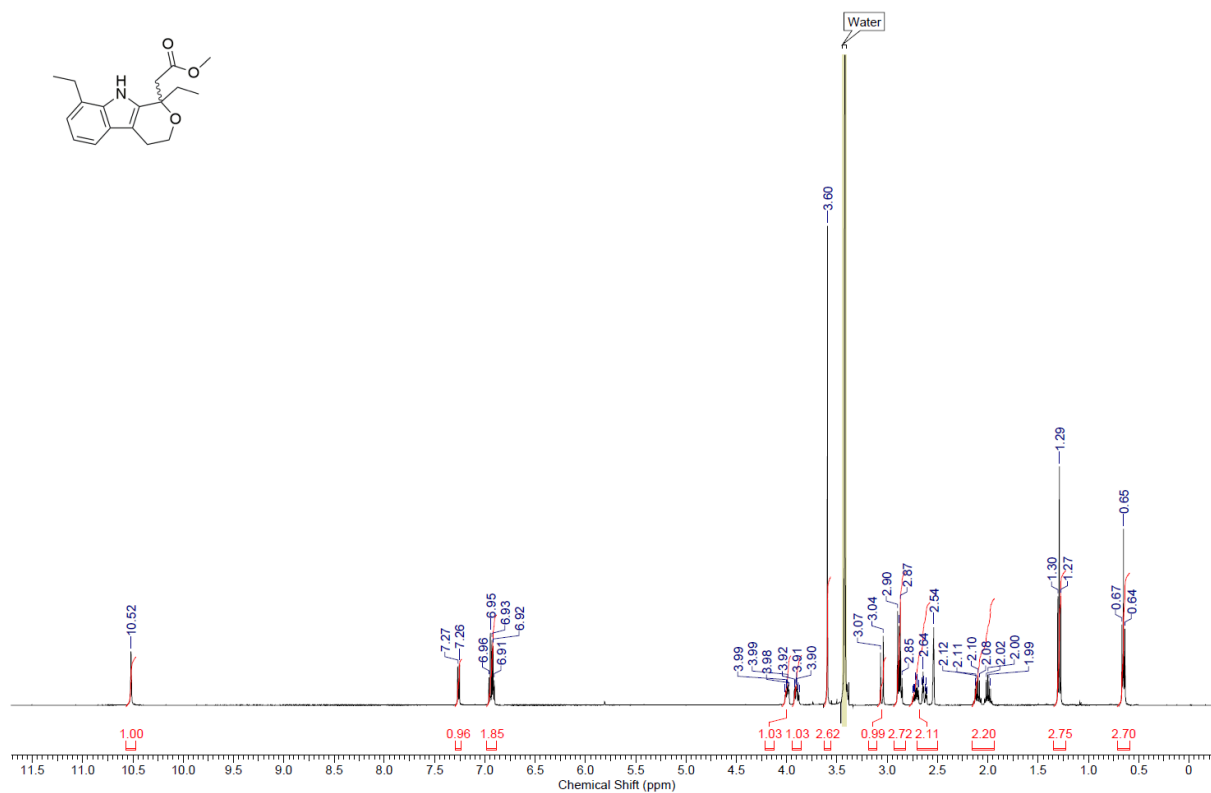

<sup>13</sup>C NMR spectrum of *rac*-5a (126 MHz, DMSO-*d*<sub>6</sub>)

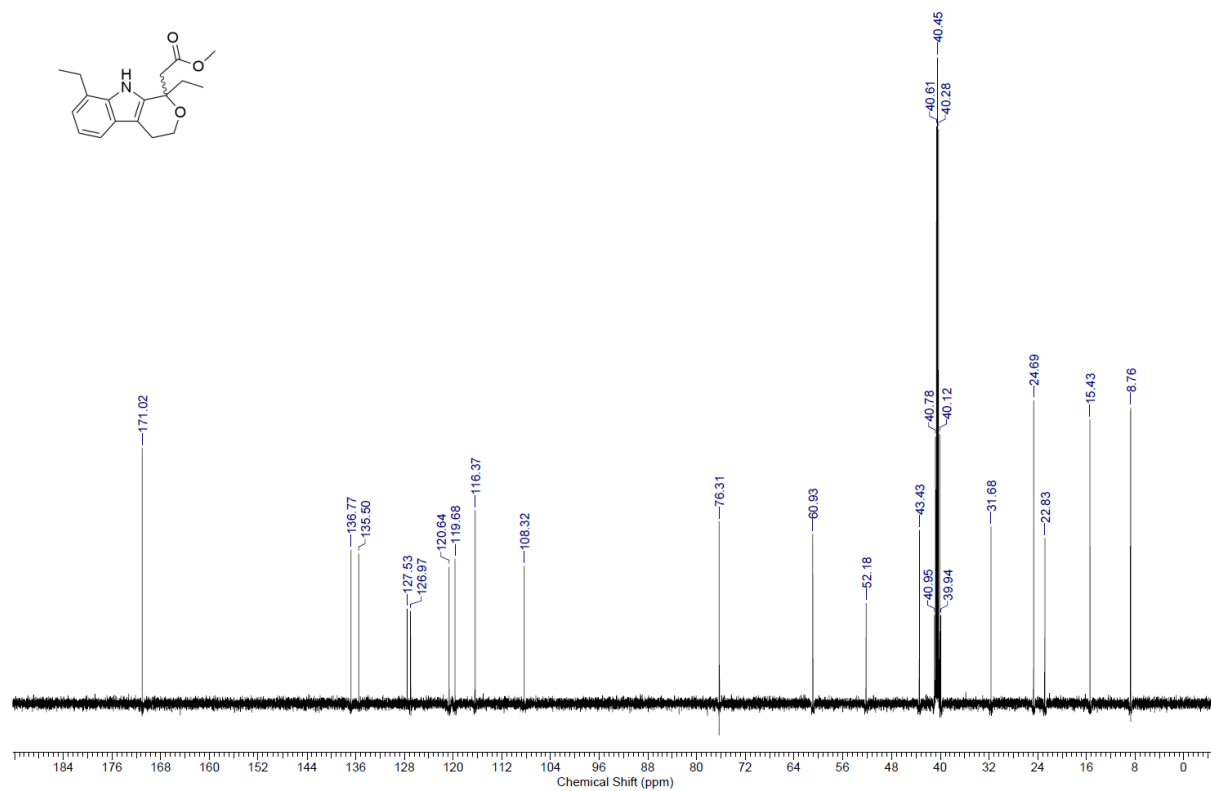

FTIR spectrum of *rac*-**5a** (Mineral oil, Nujol)

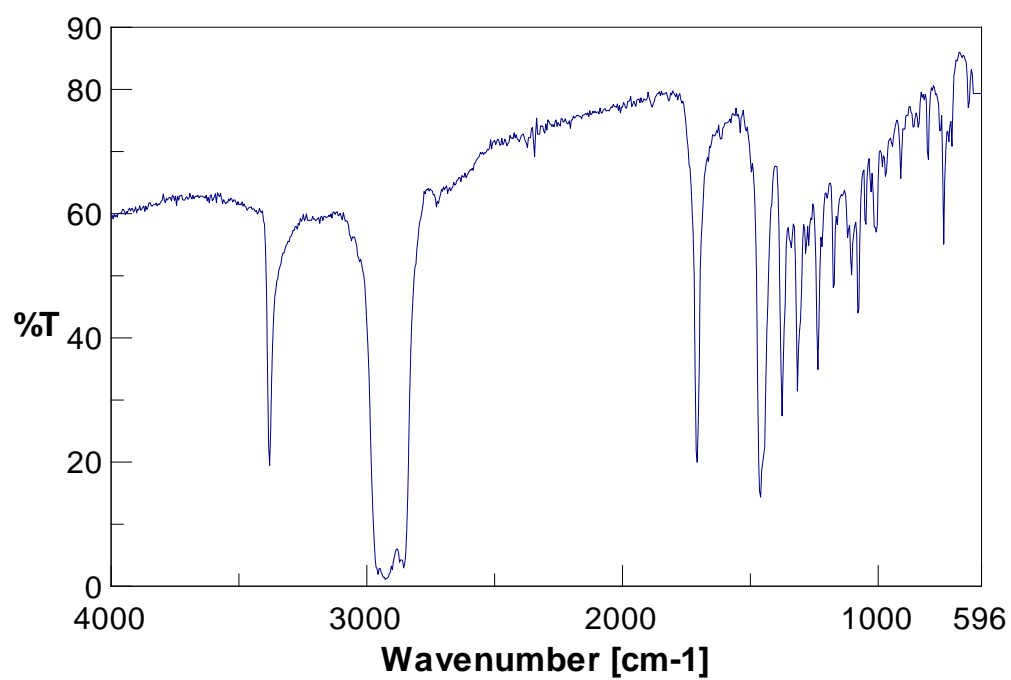

MS spectrum of *rac*-**5a** (ESI-TOF)

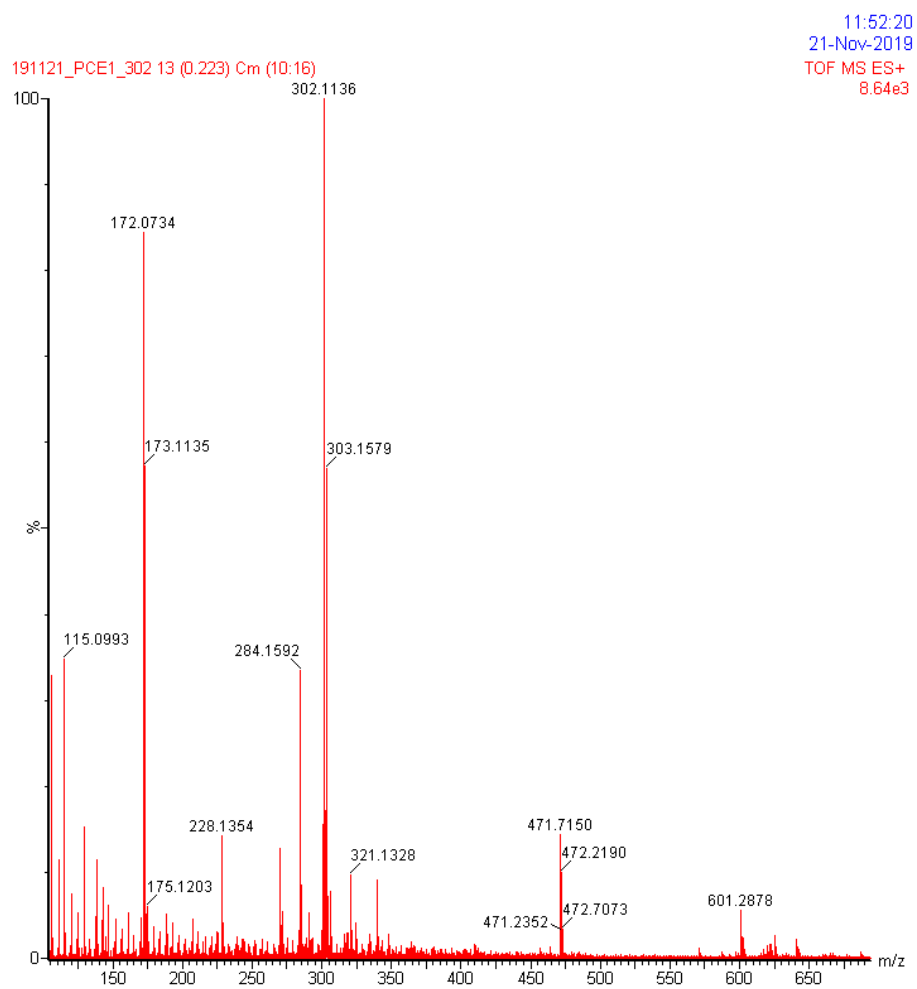

# FTMS spectrum of *rac*-5a (ESI-TOF)

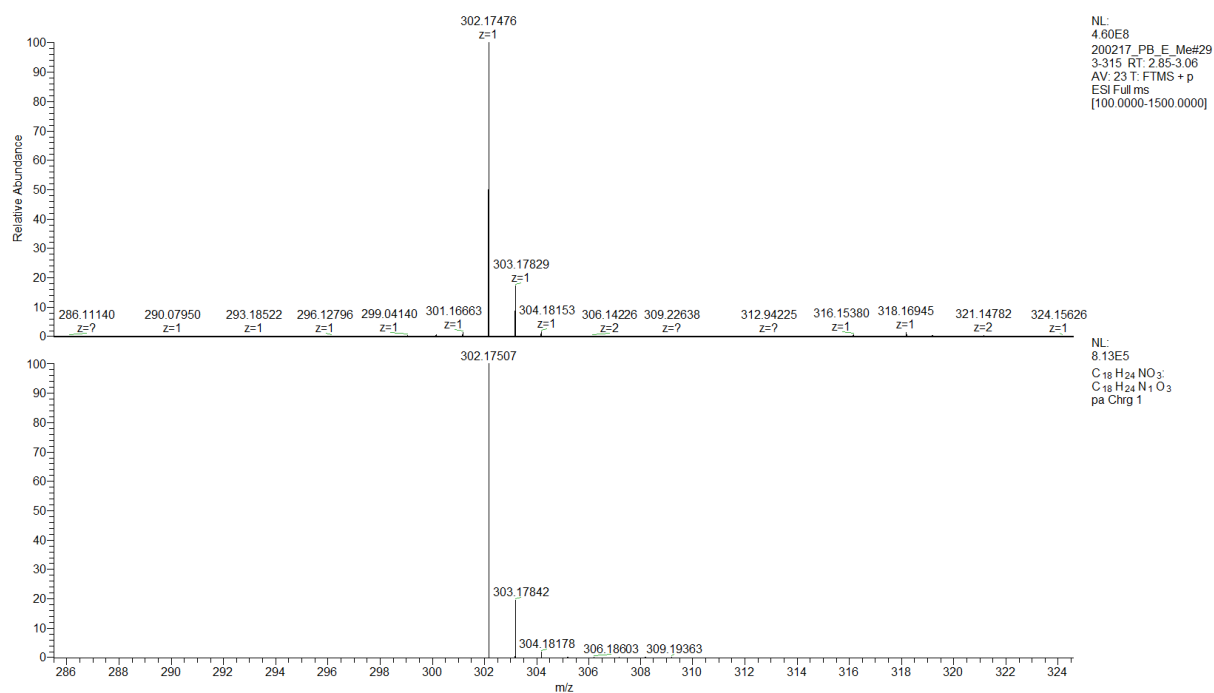

***Ethyl (1,8-diethyl-1,3,4,9-tetrahydropyrano[3,4-b]indol-1-yl)acetate (Etodolac ethyl ester, rac-5b)***

<sup>1</sup>H NMR spectrum of *rac-5b* (500 MHz, CDCl<sub>3</sub>)

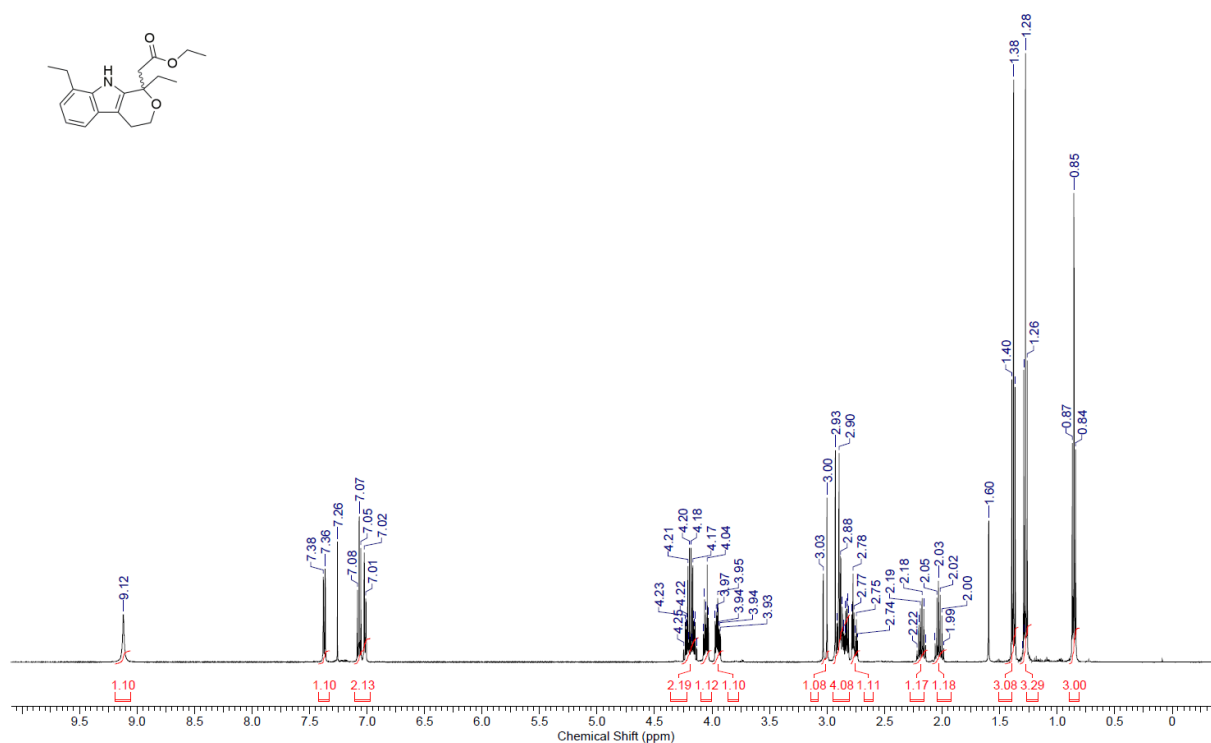

<sup>13</sup>C NMR spectrum of *rac-5b* (126 MHz, CDCl<sub>3</sub>)

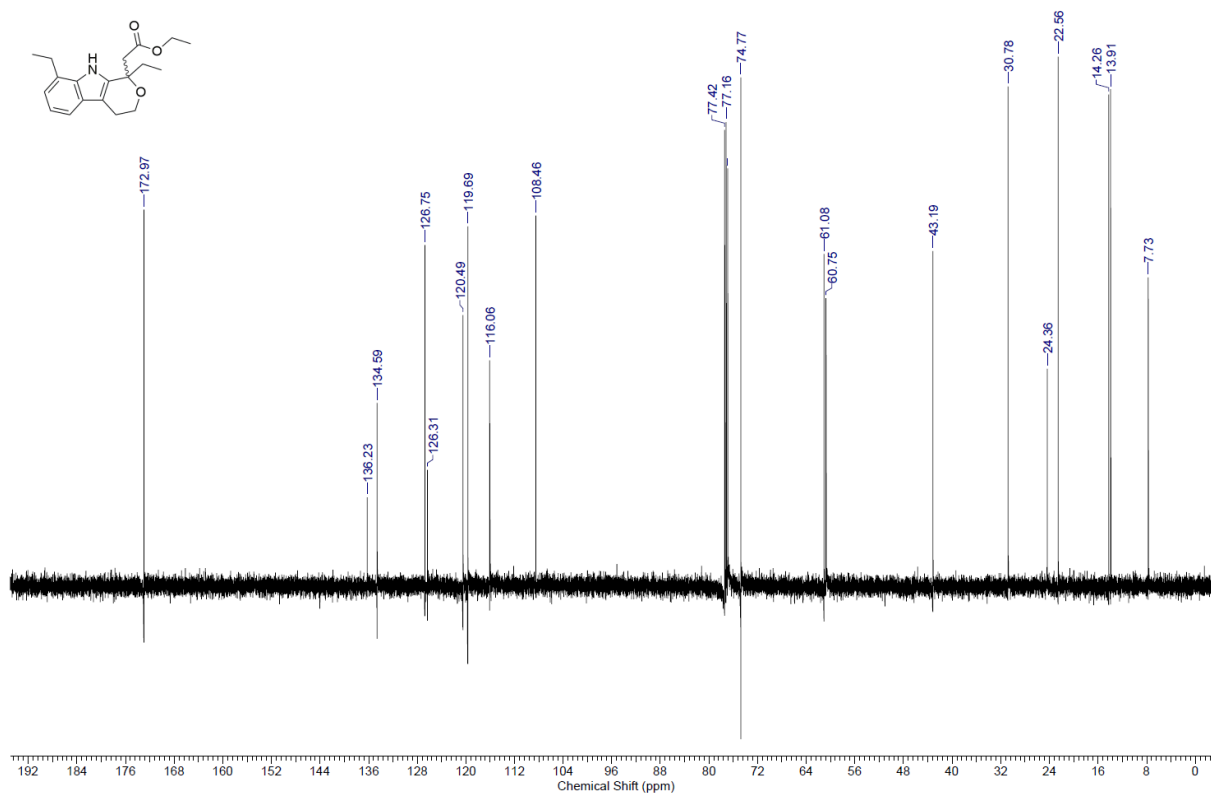

FTIR spectrum of *rac*-**5b** (Mineral oil, Nujol)

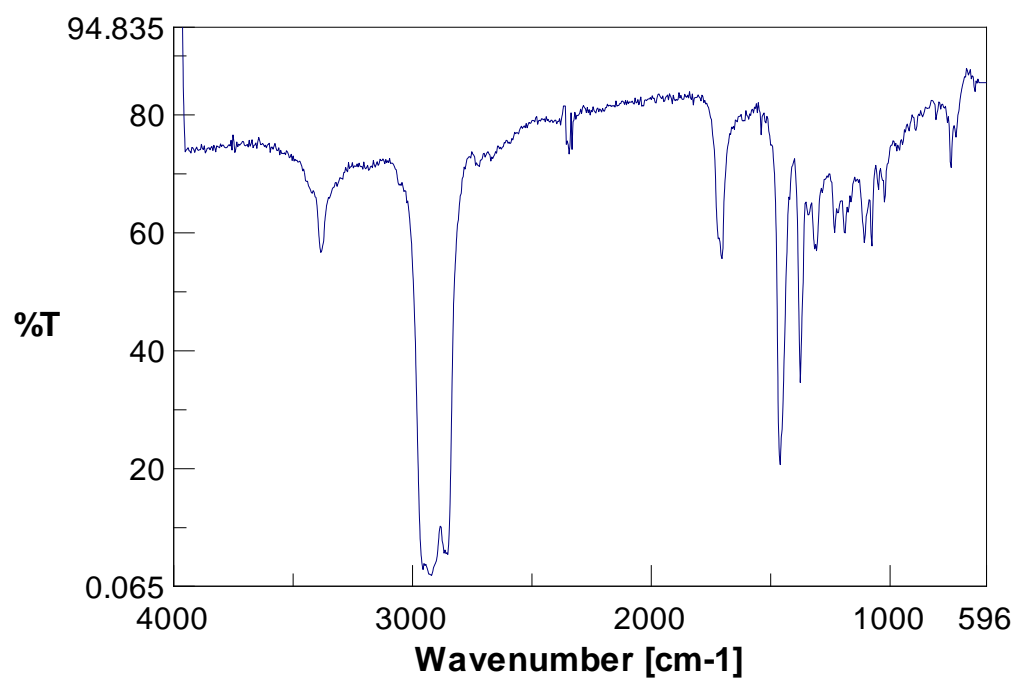

MS spectrum of *rac*-**5b** (ESI-TOF)

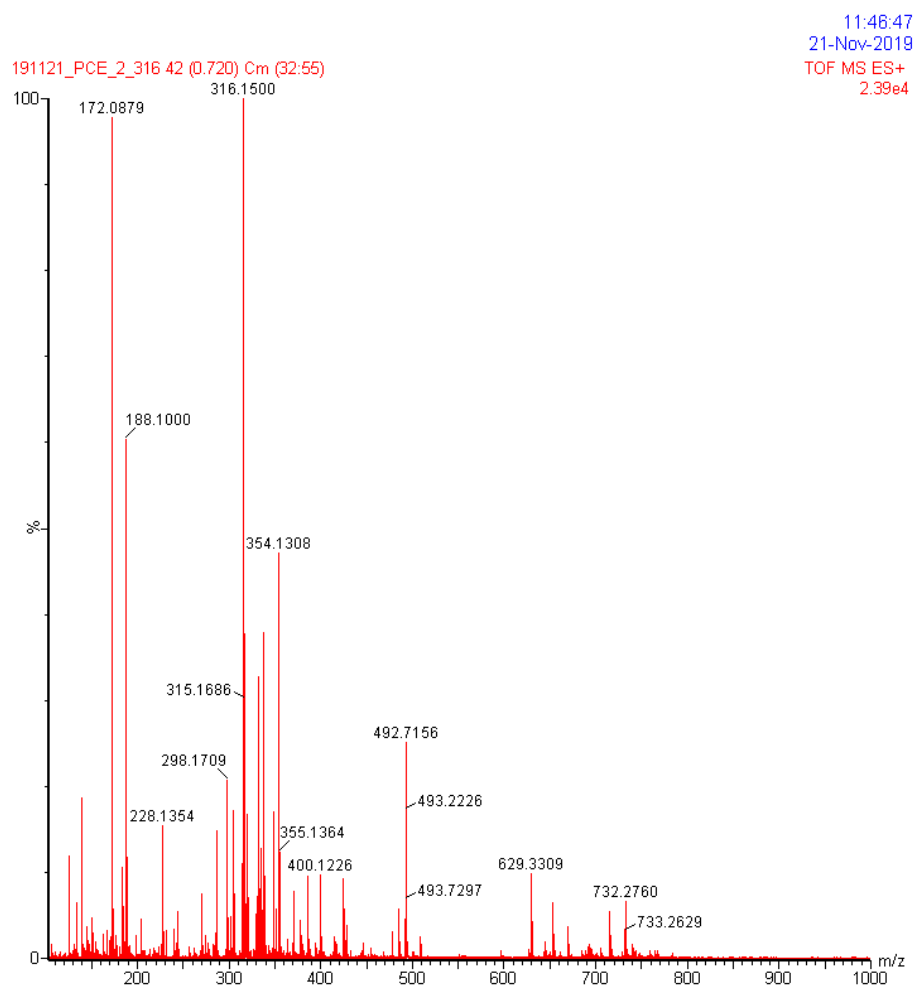

# FTMS spectrum of *rac*-**5b** (ESI-TOF)

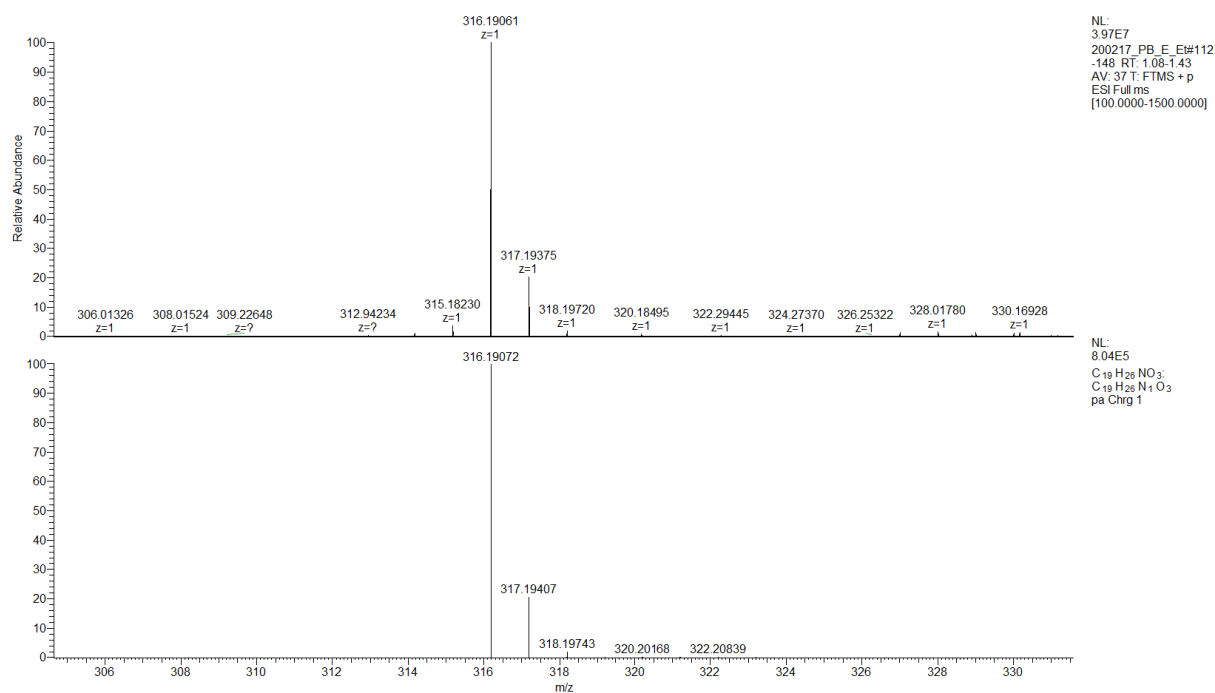

## References

- [1] Rana, N.K.; Singh, V.K., Enantioselective enolate protonation in sulfa-michael addition to alpha-substituted n-acryloyloxazolidin-2-ones with bifunctional organocatalyst. *Org. Lett.* **2011**, *13*, 6520–6523. [10.1021/ol202808n]
- [2] Miyamoto, K.; Ohta, H., Enzyme-mediated asymmetric decarboxylation of disubstituted malonic acids. *J. Am. Chem. Soc.* **2002**, *112*, 4077–4078. [10.1021/ja00166a076]
- [3] Chikusa, Y.; Fujimoto, T.; Ikunaka, M.; Inoue, T.; Kamiyama, S.; Maruo, K.; Matsumoto, J.; Matsuyama, K.; Moriwaki, M.; Nohira, H., *et al.*, (s)-3-methyl-2-phenylbutylamine, a versatile agent to resolve chiral, racemic carboxylic acids<sup>1</sup>. *Org. Proc. Res. Dev.* **2002**, *6*, 291–296. [10.1021/op010081z]
- [4] Galletti, P.; Emer, E.; Gucciardo, G.; Quintavalla, A.; Pori, M.; Giacomini, D., Chemoenzymatic synthesis of (2s)-2-arylpropanols through a dynamic kinetic resolution of 2-arylpropanals with alcohol dehydrogenases. *Org. Biomol. Chem.* **2010**, *8*, 4117–4123. [10.1039/C005098A]
